1     **Developmental exposure to pesticide contaminated food impedes bumblebee brain growth**  
2                                     **predisposing adults to become poorer learners**

3     Dylan B. Smith<sup>1</sup>, Andres N. Arce<sup>1</sup>, Ana Ramos Rodrigues<sup>1</sup>, Philipp H. Bischoff<sup>1</sup>, Daisy Burris<sup>1</sup>, Farah Ahmed<sup>2</sup>  
4     and Richard J. Gill<sup>1</sup>\*

5     <sup>1</sup>Department of Life Sciences, Imperial College London, Silwood Park, Buckhurst Road, Ascot, Berkshire,  
6     SL5 7PY, UK.

7     <sup>2</sup>Core Research Laboratories, Natural History Museum, Cromwell Road, London, SW7 5BD, UK.

8     \* correspondence: r.gill@imperial.ac.uk

9     **Keywords:** 3D reconstruction, *Bombus terrestris*; Imidacloprid, micro computed tomography scanning,  
10     mushroom body calyces, neonicotinoid, olfactory, segmentation, sublethal

11     **Abstract**

12     Understanding the risk to biodiversity from pesticide exposure is a global priority. For bees, an  
13     understudied step in evaluating pesticide risk is understanding how pesticide contaminated foraged food  
14     brought back to the colony can affect developing individuals. Provisioning bumblebee colonies with  
15     pesticide (neonicotinoid) treated food, we investigated how exposure during two key developmental  
16     phases (brood and/or early-adult), impacted brain growth and assessed the consequent effects on adult  
17     learning behaviour. Using micro-computed tomography ( $\mu$ CT) scanning and 3D image analysis, we  
18     compared brain development for multiple neuropils in workers 3 and 12-days post-emergence.  
19     Mushroom body calyces were the neuropils most affected by exposure during either of the developmental  
20     phases, with both age cohorts showing smaller structural volumes. Critically, reduced calyces' growth in  
21     pesticide exposed workers was associated with lower responsiveness to a sucrose reward and impaired  
22     learning performance. Furthermore, the impact from brood exposure appeared irrecoverable despite no  
23     exposure during adulthood.

24

## 25 **Introduction**

26 Insect pollinator declines are of worldwide concern (Hallmann et al., 2017; Potts et al., 2016; Vanbergen,  
27 2013), and safeguarding this important functional group and ecosystem service provider requires a deep  
28 understanding of the driving factors (Gill et al., 2016; Goulson et al., 2015). Social bees, such as  
29 bumblebees, honeybees and stingless bees are important insect pollinators, and the threat posed by  
30 pesticide exposure is a widespread issue (Brittain and Potts, 2011; Desneux et al., 2007; Woodcock et al.,  
31 2017). Pesticide residues have been found inside colonies across the globe (Calatayud-Vernich et al., 2018;  
32 Daniele et al., 2018; Mitchell et al., 2017; Mullin et al., 2010; Valdovinos-Flores et al., 2017), raising  
33 concerns as to how the prevalence of such chemicals in the environment could affect colony development  
34 (Gill et al., 2012; Pohorecka et al., 2017; Whitehorn et al., 2012). For instance, controlled exposure  
35 experiments and field studies investigating exposure to neonicotinoid pesticides have reported reduced  
36 colony growth and sexual output (Arce et al., 2017; Baron et al., 2017; Gill et al., 2012; Leza et al., 2018;  
37 Rundlöf et al., 2015; Tsvetkov et al., 2017; Whitehorn et al., 2012). Such colony level effects are likely to  
38 be caused by exposure impairing worker behaviour, with cumulative effects across workers leading to a  
39 functionally weakened colony (Bryden et al., 2013; Crall et al., 2018). One possibility is that neonicotinoids,  
40 being a neurotoxic pesticide, affect neuronal processes important for cognitive and learning abilities  
41 (Decourtye et al., 2004; Siviter et al., 2018b) translating to impaired colony tasks (Feltham et al., 2014;  
42 Fischer et al., 2014; Gill and Raine, 2014).

43 With neurotoxic pesticide residues frequently reported in the pollen and nectar brought back by foragers  
44 (Botias et al., 2015; Chauzat et al., 2006; David et al., 2016; Kasiotis et al., 2014; Pohorecka et al., 2012),  
45 individuals developing and residing in the colony are likely to be chronically exposed to these compounds  
46 (Pohorecka et al., 2017). A possibility, therefore, is that tissue development, such as the central nervous

47 system, is impeded. For example, honeybees reared under sub-optimal environmental conditions have  
48 exhibited reduced brain volumetric growth and altered neuronal architecture (Groh et al., 2004; Steijven  
49 et al., 2017). Impeded brain development and structural plasticity may impact on behaviours such as  
50 learning ability, that require detection, assimilation and processing of sensory input from the environment  
51 (Cabirol et al., 2018; Chittka, 2017; Galizia et al., 2011). Knowledge of how pesticide contaminated food  
52 inside bee colonies can affect individual physiological development however, is limited (Gregorc et al.,  
53 2012; Wu et al., 2012, 2011). Moreover, there has been an urgent call for research linking how potential  
54 pesticide induced impairment to brain development can translate to task performance as later adults  
55 (Siviter et al., 2018b; Tan et al., 2015; Tomé et al., 2012; Yang et al., 2012). We directly address this call by  
56 investigating how developing bumblebees exposed to a neonicotinoid pesticide via treated provisioned  
57 food may alter brain development and link this to effects on associative learning behaviour.

58 To experimentally test the effect of pesticide exposure on individual development we needed to first  
59 consider the level of developmental plasticity in behaviour and brain growth. In social bees, worker  
60 maturation can correlate with stereotyped behavioural changes (Goulson, 2010; Johnson, 2010), and  
61 increased brain neuropil volumes (functional structures) (Durst et al., 1994; Galizia et al., 2011; Li et al.,  
62 2017; Winnington et al., 1996; Withers et al., 1993). However, it has been recognised that dissecting  
63 innate effects of age (experience independent change) from co-varying cumulative increases in sensory  
64 input (experience dependent change) on behaviour and brain development is difficult (Fahrbach et al.,  
65 1998; Jones et al., 2013; Maleszka et al., 2009; Riveros and Gronenberg, 2010). To distinguish the effects  
66 of pesticide exposure from variation caused by other interacting factors, we therefore: i) attempted to  
67 standardise experience and sensory input across tested workers, ii) tested workers of controlled age, and  
68 iii) compared between young and old age cohorts. Furthermore, by studying two main developmental  
69 stages, such as brood (larval & pupal) and early adulthood, here we reveal which development phase is  
70 more vulnerable to pesticide exposure, and whether developmental plasticity in bee brains (Farris et al.,

71 2001; Galizia et al., 2011; Riveros and Gronenberg, 2010; Withers et al., 1995) allows recovery during an  
72 unexposed later stage.

73 Despite the functional importance of non-*Apis* bees (Brittain et al., 2013; Garibaldi et al., 2013; Gill et al.,  
74 2016) and possible differences in pesticide sensitivity relative to honeybees (Cresswell et al., 2012; Heard  
75 et al., 2017; Piironen and Goulson, 2016; Rundlöf et al., 2015; Woodcock et al., 2016), empirical tests on  
76 non-*Apis* bees looking at the physiological response to stress, such as postembryonic neuronal  
77 development, are limited. Here we studied the response of the bumblebee, *Bombus terrestris*, a species:  
78 i) that can be reared under controlled laboratory conditions; ii) for which learning performance assays  
79 have been developed (Muth and Leonard, 2019; Riveros and Gronenberg, 2009; Siviter et al., 2018b; Smith  
80 and Raine, 2014); iii) individuals can be exposed to pesticides within the social colony environment rather  
81 than in isolation (Gill et al., 2012; Maleszka et al., 2009; Whitehorn et al., 2012). Here, we chronically  
82 exposed cohorts of workers, reared inside their natal colonies, to a 5ppb concentration of the  
83 neonicotinoid imidacloprid via provisioned sugar solution (40% sucrose) during two different  
84 developmental stages: a) before and b) after adult eclosion from the pupal case. We investigated how the  
85 link between brain growth and learning behaviour may be affected in workers exposed during: brood  
86 development (*pre-eclosion*), early adulthood (*post-eclosion*) and both these developmental periods  
87 (*continual*), comparing each to unexposed (*control*) workers. For each treatment we tested adult workers  
88 at 3 or 12-days after eclosion (Figure 1).

89 Firstly, we tested worker response to sucrose and then on olfactory associative learning performance  
90 using the established proboscis extension reflex (PER) conditioning paradigm (Figure S1) (Bitterman et al.,  
91 1983; Giurfa and Sandoz, 2012; Laloi et al., 1999; Riveros and Gronenberg, 2009; Sommerlandt et al.,  
92 2014), which has previously been used to test pesticide effects on adult learning in honey bees exposed  
93 during the larval stage (Tan et al., 2015; Yang et al., 2012), and bumblebees exposed as adults (Piironen

94 and Goulson, 2016; Stanley et al., 2015; Tison et al., 2017). Secondly, we employed new advances in micro-  
95 computed tomography ( $\mu$ CT) scanning and 3D image analysis to explore the brain *in situ* (within headcase)  
96 and enable non-destructive volumetric measurements to a standardised voxel size of  $4\mu\text{m}$  (Figure 2)  
97 (Baird and Taylor, 2017; Gutiérrez et al., 2018; Ribi et al., 2008; Smith et al., 2016). We segmented five  
98 key neuropils: mushroom bodies (associated with learning), antennal lobes (olfaction), optic lobes -  
99 medullas and lobulas (vision), and central body (motor function; Table S1). For the mushroom bodies we  
100 segmented the two major components, lobes and calyces, to investigate responses of the different  
101 functionally multisensory input and output regions, respectively (Fahrbach, 2006; Heisenberg, 2003).  
102 Using a sample size exceeding any other study investigating bee brain morphology to date, we present  
103 the first comparative study to directly link how chronic pesticide exposure impacts learning performance  
104 by affecting bee brain development.

105

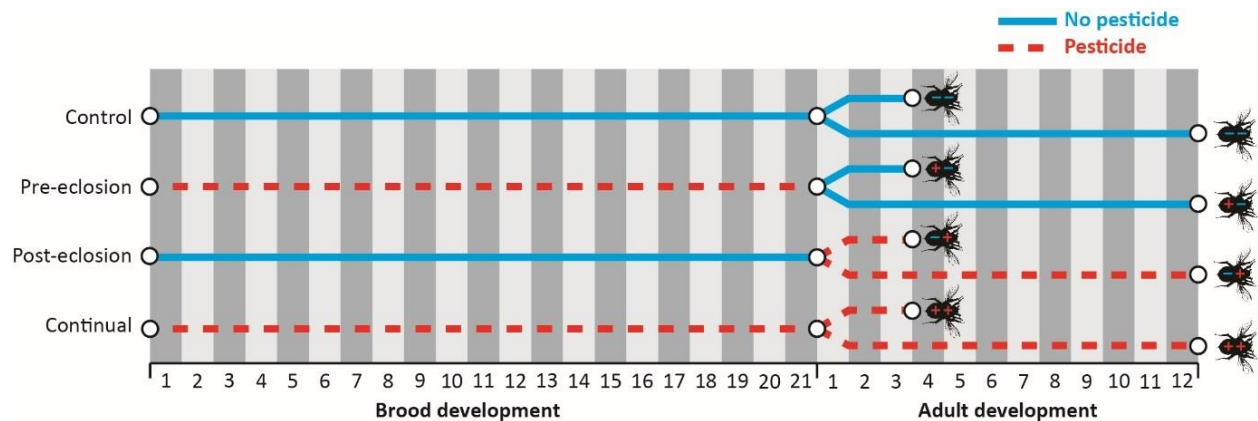

106

107 **Figure 1. Graphic showing exposure periods for the four colony treatments (*control, pre-eclosion, post***  
108 ***eclosion & continual*) and the eight cohorts of individual workers to be tested.** Blue solid line represents  
109 untreated food (sucrose solution) and red dashed line represents pesticide-treated food. 'Brood  
110 development' represents the larval and pupal (brood) stages of workers, with 'Adult development'  
111 representing the number of days after eclosion from the pupal case. Individual bee symbols depict  
112 removal of controlled aged adult workers at 3 or 12-days after eclosion for behavioural testing followed  
113 by decapitation for  $\mu$ CT scanning of the brain.

114

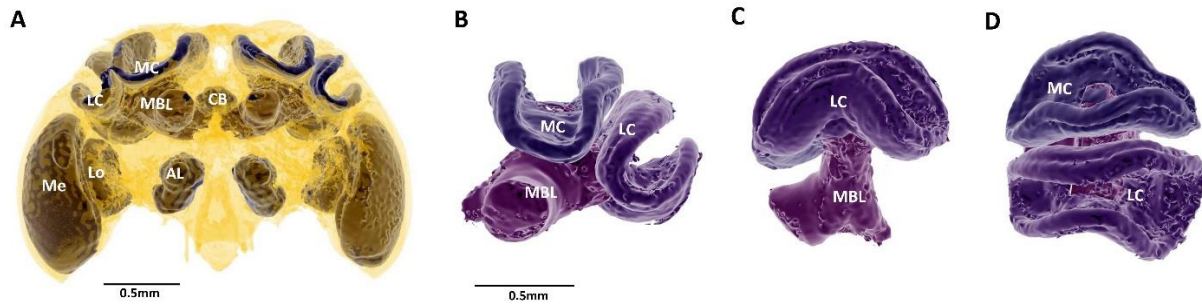

115

116 **Figure 2. 3D rendering of one of the studied bumblebee brains using the  $\mu$ CT imaging method. a**, Focal  
117 neuropils considered in this study shown in dark purple (optic lobes: medulla (Me), lobula (Lo); antennal  
118 lobes (AL); central body (CB); mushroom body: calyces (including lateral calyx (LC) & medial calyx (MC)  
119 and lobes (MBL)), surrounded by remaining brain tissue in transparent yellow. **b-d**, Isolated 3D structure  
120 of the mushroom body which has been rotated to show **b**, frontal, **c**, lateral, and **d**, dorsal views.

121

## 122 Results

### 123 *Responsiveness*

124 Prior to the learning assay, we confirmed whether harnessed workers (n=413; Table S2) showed a PER in  
125 response to their antenna being touched by a 50% sucrose solution droplet (Figure S1). We found a  
126 significantly higher proportion of 12-day compared to 3-day workers responded (GLM: *age*:  $z=-4.10$ ,  
127  $p<0.001$ ) which was consistent across treatments as evidenced by no *age\*treatment* effect and the  
128 interaction term not being retained in the model (Table S3). We also found consistent negative model  
129 estimates for all three pesticide treatments relative to *control*, and detected a significantly lower  
130 proportion of responsive workers from *post-eclosion* and *continual* exposed colonies ( $z=-2.53$ ,  $p=0.011$  &  
131  $z=-2.40$ ,  $p=0.016$ ; Figure 3).

### 132 *Learning*

133 For the responsive workers (n=181; Table S2), we tested each worker's ability to learn to associate an  
134 odour with a sucrose reward by demonstrating a PER response over ten consecutive trials (Figure S1; see  
135 methods). Firstly, we categorised workers as either those exhibiting at least one response as 'learners'  
136 and those showing no learnt response as non-learners. Whilst our model showed a positive estimate for  
137 the effect of *age*, unlike responsiveness we did not detect a significant increase which was consistent  
138 across treatments as evidenced by no *age\*treatment* effect and the interaction term not being retained  
139 in the model (Table S3). However, we again detected a strong effect of pesticide exposure relative to the  
140 *control*, with each treatment showing a significantly lower proportion of learners (GLM: *pre-eclosion*: z=-  
141 4.38, p<0.001; *post-eclosion*: z=-3.49, p<0.001; *continual*: z=-2.78, p<0.01; Figure 3b).

142 For all individuals classed as learners, we then looked at how the proportion of learnt responses changed  
143 over the successive trials (analysis considered trials 2-10, as by definition a naïve worker cannot learn on  
144 the first trial). However, because of the strong negative effect of pesticide exposure on passing the  
145 responsiveness stage and proportion of learners, sample sizes for each pesticide treatment were  
146 significantly reduced. Therefore, given the similarity in responses across pesticide treatments, we pooled  
147 all workers from these three treatments and compared them to *control* whilst not distinguishing between  
148 3-and 12-day workers. From this analysis we found that the proportion of responses increased over the  
149 trials (GLM polynomial:  $p^1$ : t=14.26, p<0.001). This relationship, however, was non-linear and the  
150 incremental proportion decreased in rate over the consecutive trials ( $p^2$ : t=-2.48, p=0.014; Table S3). This  
151 was primarily driven by the significant negative effect of pesticide exposure (t=-2.04, p=0.046), with  
152 workers from exposed colonies showing a distinctly lower proportion of learnt responses in the latter few  
153 trials relative to *control* (Figure 4).

154

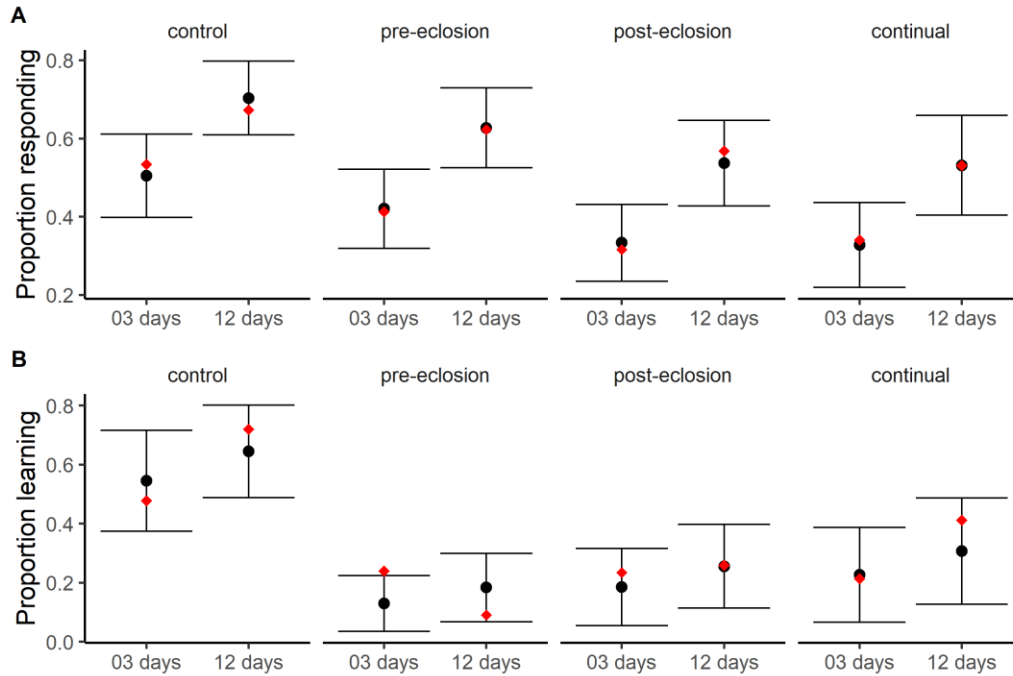

155

156 **Figure 3. Proportion of responsive workers and proportion demonstrating an olfactory associative**  
157 **learning response using proboscis extension reflex (PER) conditioning between treatments. A, Workers**  
158 **exhibiting a PER response when touching the antennae with a sucrose solution droplet prior to the PER**  
159 **conditioning trials; B, Learners (workers exhibiting at least one learnt response during the PER**  
160 **conditioning trials). Intersecting circular point represents the estimated model mean taken from back-**  
161 **transformation of the model (binomial GLM) with bars depicting the associated  $\pm 95\%$  confidence limits.**  
162 **Red diamond corresponds to the mean value taken from the raw response data.**

163

164



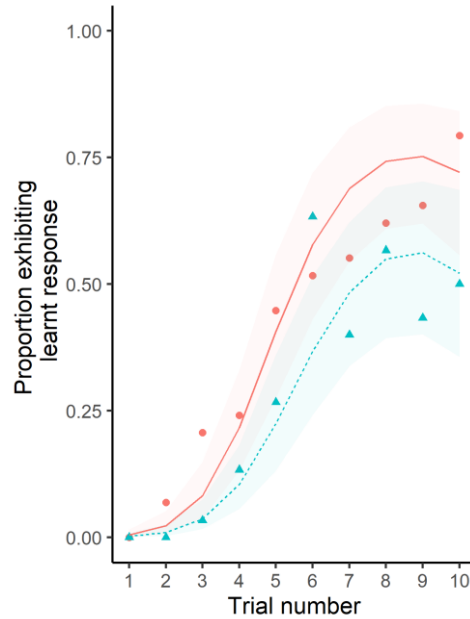

165

166 **Figure 4. Proportion of workers by trial exhibiting an olfactory conditioned learnt response.** Workers  
167 from all three pesticide treatments were pooled (blue triangles; n=30 workers) and compared against  
168 *control* workers (red circles; n=29), with both age cohorts aggregated per treatment. Lines (blue dashed =  
169 pesticide treatment; red solid = control) represent the binomial model (LMER polynomial) estimates over  
170 the consecutive trials.

171

#### 172 *Brain neuropil volumes*

173 Focusing first on the mushroom body calyces, relative volumes were significantly smaller in workers from  
174 all three pesticide exposure treatments compared to *control* (*pre-eclosion*:  $t=-2.41$ ,  $p=0.049$ ; *post-*  
175 *eclosion*:  $t=-3.83$ ,  $p<0.01$ ; *continual*:  $t=-2.90$ ,  $p=0.021$ ; Table S4-5). This was consistent for both 3 and 12-  
176 day workers as evidenced by no effect of *age\*treatment* and the interaction term not being retained in  
177 the model (Table S5). Focusing second on the relative volume of the mushroom body lobes, we again  
178 found negative model estimates for all three pesticide treatments relative to the *control*, however unlike  
179 the calyces none of these comparisons were detected as significantly lower (Table S5). Analysis of the four  
180 other segmented neuropils (central body, antennal lobes, lobulas and medullas) further showed that

181 workers from pesticide treated colonies showed no significant volumetric differences relative to *control*,  
182 although we did find consistent negative model estimates for the antennal lobes across all pesticide  
183 treatments (Table S6).

184

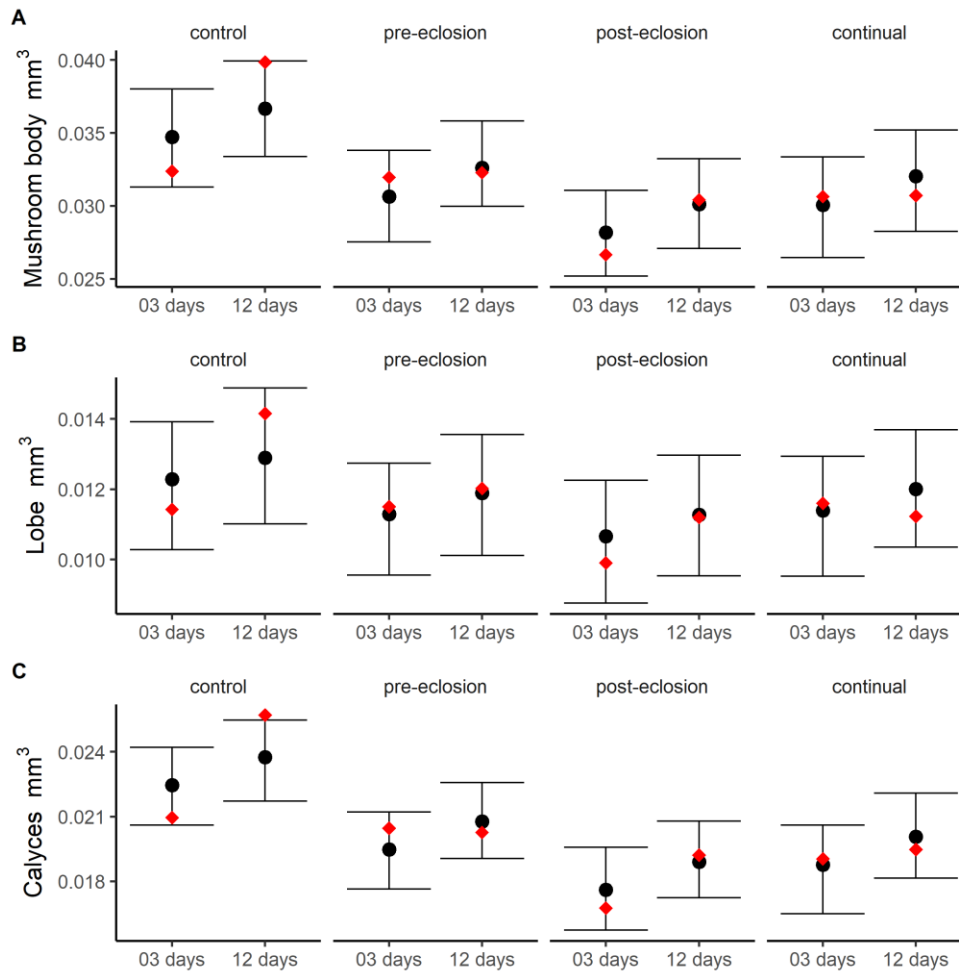

185

186 **Figure 5. Volumes for A) whole mushroom body, B) mushroom body calyces and C) mushroom body**  
187 **lobes of bumblebee workers.** These represent volumes relative to the body size of the worker (absolute  
188 volume divided by body size). Intersecting circular point represents the estimated model mean taken from  
189 back-transformation of the model (LMER) with bars depicting the associated  $\pm 95\%$  confidence limits. Red  
190 diamond corresponds to the mean value taken from the raw response data.

191

192 *Relationship between mushroom body calyces volume and learning score*

193 For each responsive worker that started the PER conditioned learning assay and for which we had the  
194 volume of their mushroom body calyces, we took the total number of demonstrated learnt responses  
195 ('learning score') and investigated the association with relative calyces' volume as the predictor variable  
196 (given this was the neuropil most affected from exposure). As we did for the learning-by-trial data, we  
197 pooled all workers from the three pesticide exposure treatments and compared their scores to that of  
198 *control* workers when no distinguishing age. From this, we found a significant positive association  
199 between relative volume of the calyces and learning score ( $t=4.51$ ,  $p<0.001$ ; Figure 6; Figure S2), but this  
200 relationship was driven by *control* workers in which larger calyces equated to higher learning score.  
201 Pesticide exposed workers, in contrast, showed no clear relationship as supported by the significant  
202 negative *volume\*treatment* interaction ( $t=-3.96$ ,  $p<0.001$ ; Table S7-8). This finding reveals that impaired  
203 functioning of the mushroom body in workers from pesticide exposed colonies is not only from reduced  
204 volumetric growth, but presumably also from affected physiological composition of the tissue.

205

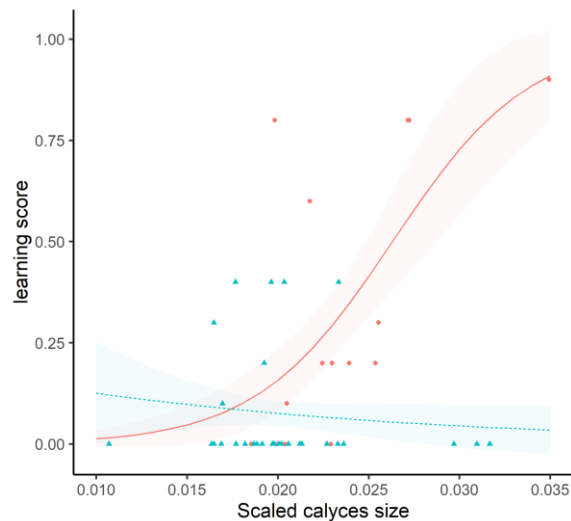

206

207 **Figure 6. Relative volume of mushroom body calyces plotted against learning score.** Calyces volume  
208 predicts learning score for *control* workers but not pesticide exposed workers. Workers from all three

209 pesticide treatments were pooled (blue triangles) and compared against *control* workers (red circles), with  
210 fitted lines (blue dashed = pesticide treatment; red solid = control) representing binomial model (GLM)  
211 estimates.

212

## 213 **Discussion**

214 Our study reveals that worker bumblebees exposed to a neurotoxic pesticide, a neonicotinoid, can affect  
215 the developmental plasticity of the brain with reduced volumetric growth manifested not only from  
216 exposure as an adult but also during brood development. The effects on adult behaviour and brain  
217 physiology from brood exposure (*pre-eclosion*) appeared irrecoverable despite no experimental provision  
218 of pesticide treated food during the 12-days of adulthood. Critically, impeded growth of the mushroom  
219 body calyces of worker brains from pesticide exposure, was associated with functional impairment as  
220 evidenced by reduced responsiveness and poorer olfactory learning behaviour.

### 221 *Pesticide exposure during early development affected responsiveness and learning*

222 Neonicotinoid exposure as an adult (*post-eclosion* & *continual*) reduced the proportion of workers  
223 responding to a sucrose droplet prior to the PER assay, and reduced olfactory learning performance during  
224 the PER assay. These findings contribute to previous studies reporting adult neonicotinoid exposure  
225 negatively affecting aspects of responsiveness in honeybees (Aliouane et al., 2009; Démares et al., 2018,  
226 2016) and learning in bumblebees (Stanley et al., 2015). However, a key novelty of our study is that we  
227 could compare responses from chronic exposure between age cohorts. Firstly, this revealed that young  
228 (3-day) and older (12-day) workers from *post-eclosion* and *continual* exposure colonies were similarly  
229 affected despite differences in the number of days of adult exposure. Additionally, despite *pre-eclosion* 3-  
230 day adults being exposed for up to 3-weeks during brood development, compared to only three days of  
231 exposure for 3-day adults from *post-eclosion* colonies, the degree of impaired learning was again similar.

232 Together these findings highlight the first 72 hours of adulthood to be critical in behavioural development,  
233 and reveals a susceptible developmental window to environmental stress (in this case pesticide exposure)  
234 (Sandrock et al., 2014; Wu et al., 2011), reiterating the importance of considering different life-stages  
235 when assessing pesticide risks.

236 Secondly, workers exposed during brood development (*pre-eclosion*), that received no or substantially  
237 lower exposure as an adult, exhibited impaired learning performance at a similar reduced level as adult  
238 only exposed workers (*post-eclosion*). This indicates a lag-effect from brood exposure on adult learning,  
239 highlighting the importance of considering delayed effects of pesticide exposure; a view reinforced by  
240 other studies on honeybees (*Apis cerana* & *A. mellifera*) and a stingless bee (*Melipona quadrifasciata*  
241 *anthidioides*) reporting larvae reared under topical or oral neonicotinoid exposure exhibited negative  
242 effects on adult learning and motor function (Tan et al., 2015; Tomé et al., 2012; Yang et al., 2012). More  
243 importantly, with 3- and 12-day adults from *pre-eclosion* colonies exhibiting a similar level of impaired  
244 learning performance, this reveals that the effects from brood exposure appear irrecoverable even as an  
245 unexposed adult.

246 *Impaired learning in pesticide exposed workers was associated with reduced volumetric growth of the*  
247 *mushroom body calyces*

248 Focusing on the mushroom body calyces, 12-day adult workers from all pesticide exposure treatments  
249 possessed smaller mushroom body calyces relative to *control* colonies, and we even found differences in  
250 3-day adult workers from *post-eclosion* and *continual* exposed colonies. With rates of mushroom body  
251 development in bumblebees considered to be at its highest during the first 72 hours of adulthood (Jones  
252 et al., 2013; Riveros and Gronenberg, 2010), this may explain why in our experiment an effect on calyces  
253 volume was detected in just 3-days of adulthood. Furthermore, our finding that 3-day adults from both

254 *pre-eclosion* and *post-eclosion* exposed colonies showed similar reductions in mushroom body volumes,  
255 reiterates the apparent vulnerability of brain development during the first 72 hours.

256 Average volume reductions of the mushroom body calyces and lobes showed a strikingly mirrored pattern  
257 to the reduced proportion of learners in each respective pesticide treatment. More tellingly, when relative  
258 volume of the calyces was plotted against each respective worker's learning score, bigger relative brain  
259 size equated to better learning performance in *control* workers, but this relationship was not found for  
260 pesticide exposed workers. Despite some *control* and pesticide exposure workers possessing similar  
261 relative mushroom body volumes, pesticide exposure workers demonstrated a lower learning score  
262 indicating impaired neuronal functioning of this brain region. For workers from *post-eclosion* and  
263 *continual* exposed colonies this effect could be explained by sublethal neonicotinoid concentration  
264 affecting neuronal signalling given its role as a nAChE receptor agonist (Palmer et al., 2013). However,  
265 with *pre-eclosion* workers also being affected, this indicates that neonicotinoid exposure might be  
266 affecting synaptic development (i.e. proliferation & dendritic outgrowth) in the calyces. Indeed, reduced  
267 microglomeruli density has been shown to occur in neonicotinoid exposed honeybees (Peng and Yang,  
268 2016), and density of these structures is correlated with increased learning and memory in bees (Hourcade  
269 et al., 2010; Li et al., 2017). Furthermore, the reduced learning performance in *pre-eclosion* workers in our  
270 study could stem from impeded neurogenesis where neuronal precursor cells are in some way prevented  
271 from giving rise to Kenyon cells in the mushroom bodies, which in honeybees occurs during development  
272 before eclosion from the pupal case (Fahrbach et al., 1995; Farris et al., 1999). Alternatively, the size of  
273 Kenyon cells could be affected, as has been shown from exposure experiments on bumblebee cell cultures  
274 (Wilson et al., 2013).

275 *Mushroom body calyces were disproportionately affected over the other neuropils*

276 The effect of neonicotinoid exposure was primarily localized to the mushroom body, and even within this  
277 structure was manifested more heavily in the calyces than the lobes. Localised variation in plasticity has  
278 been shown in bumblebees where foraging experience increased medial but not lateral calyx volume  
279 (Riveros and Gronenberg, 2010). The calyces act as multisensory processors fed by afferent neurons,  
280 whereas the lobes predominantly function as output regions with efferent neurons, which could explain  
281 why calyx volumetric variation is more tightly associated with our measure of learning performance.  
282 Antennal lobes are involved in detecting and processing olfactory information (Galizia et al., 1999;  
283 Hansson and Anton, 2002; Sachse et al., 1999), developmentally plastic during early adulthood (Jones et  
284 al., 2013; Riveros and Gronenberg, 2010), and exhibit reduced neuronal function under nicotinic agonists  
285 (Andrione et al., 2016; Barbara et al., 2008; Thany and Gauthier, 2005). Considering pesticide exposed  
286 workers performed worse in the olfactory conditioning, we might therefore expect a pattern of impeded  
287 growth in the antennal lobes similar to that found for the mushroom body calyces. Whilst in support of  
288 this view we found consistent negative model estimates for all three pesticide treatments, unlike the  
289 calyces our analysis did not detect a significant effect. Furthermore, we found no consistent reduction in  
290 volume of the optic lobes (medullas & lobulas) or central body for pesticide exposed workers.

291 Possible explanations for the disproportionate effect of neonicotinoid exposure on the mushroom bodies  
292 may include: i) nACh receptors targeted by neonicotinoids are found in the highest density in the  
293 Kenyon cells of the mushroom bodies (Galizia et al., 2011) and so could affect Kenyon cell  
294 proliferation leading to volumetric reductions; ii) The mushroom bodies, in particular the calyces, of  
295 social insects have consistently been reported to be highly plastic structures due to their role in learning  
296 and memory development as early adults (Cabirol et al., 2018; Farris et al., 2001; Heisenberg, 2003; Jones  
297 et al., 2013; Kühn-Bühlmann and Wehner, 2006; Riveros and Gronenberg, 2010). The large amount of  
298 neuronal development and re-organisation therefore increases the risk of neurotoxic exposure interfering  
299 with this process; iii) Our experimental setup was stimulus deprived and not void, therefore whilst

300 mushroom body volumetric increase is likely to be more experience independent than dependent, we  
301 could not rule out investment in olfactory processing to compensate for a lack of visual information  
302 (Fahrbach et al., 1998; Jones et al., 2013); iv) the change in growth of non-mushroom body neuropils was  
303 simply too subtle for our  $\mu$ CT technology and/or sample sizes to detect.

#### 304 *Improved behavioural performance and mushroom body growth with age independent of experience*

305 Our study reared workers under a stimulus deprived environment, therefore a positive effect of age is  
306 indicative of experience independent age-enhanced learning. For both our measures of responsiveness  
307 and learning we found positive estimates for age, with 12-day workers performing better on average than  
308 3-day. This finding contrasts with previous bumblebee studies reporting no effect of age on aspects of  
309 learning ability (Riveros and Gronenberg, 2009; Smith and Raine, 2014), but these were carried out in  
310 foraging arenas whereby prior experiences could not be fully controlled. Indeed, to our knowledge,  
311 there is a lack of studies looking to identify innate age-related growth on bumblebee behaviour as  
312 well as on brain growth. Only one histological study on the bumblebee *Bombus impatiens* by Jones  
313 and colleagues has shown age-dependent volumetric growth in brain neuropils separate from  
314 environmental stimuli (Jones et al., 2013). Their findings suggested c.10% increase in the mushroom body  
315 calyces and lobes which interestingly is around half the increase we found in our *control* workers (just  
316 over 20%), a difference that perhaps stems from variation in methodological approaches, sample sizes  
317 (lower in Jones et al.) or taxonomic variation. However, together this evidence supports an innate increase  
318 in neuropil volume over the first 12-days of adulthood, which presumably is important to prepare workers  
319 for the complex colony tasks required at this age (Maleszka et al., 2009).

#### 320 *Implications of our findings for social insects*



321 Our findings that early exposure effects later adult behaviour provides a mechanistic explanation for why  
322 reduced colony growth is often detected 2-3 weeks after onset of neonicotinoid exposure (Arce et al.,  
323 2017; Gill et al., 2012; Rundlöf et al., 2015; Siviter et al., 2018a; Tsvetkov et al., 2017; Whitehorn et al.,  
324 2012), and why reduced colony productivity has been correlated with neonicotinoid treated neighbouring  
325 fields (Rundlöf et al., 2015; Woodcock et al., 2016). With eusocial bee colonies having overlapping  
326 generations, colonies are reliant on newly emerging cohorts of workers to be effective task performers. If  
327 future generations of workers are predisposed to be inefficient functioning cohorts, this could lead to a  
328 density dependent build-up of colony level impairment increasing the risk of colony collapse (Bryden et  
329 al., 2013). Our results suggest that even if workers were to delay undertaking a task, such as foraging, in  
330 attempt to developmentally recover, this strategy may be futile given we saw little adult recovery from 3  
331 to 12 days of adulthood from *pre-eclosion* colonies. Importantly, these effects are unlikely to be  
332 exclusively applicable to neonicotinoids as a multitude of other neurotoxic pesticides including the  
333 possible neonicotinoid replacements, sulfoxamines and butenolides (Siviter et al., 2018a; Tosi and Nieh,  
334 2019), are likely to end-up inside bee colonies with the potential to influence tissue development in reared  
335 bees.

336

## 337 **Materials & methods**

### 338 *Animal Husbandry*

339 Twenty-two *Bombus terrestris audax* colonies were delivered by a commercial supplier (Agralan Ltd), with  
340 colonies possessing a queen and mean ( $\pm$ s.e.m.) of  $14.5 \pm 1.1$  workers on arrival (Table S9) and housed in  
341 an aerated plastic box (29 x 22.5 x 13 cm). All colonies were moved to a controlled environment (23°C;  
342 60% humidity) red light room where they remained for the duration of the experiment. Throughout the  
343 experiment, colonies were provisioned untreated honeybee collected pollen (supplied by a commercial

344 supplier Agralan Ltd) ad-libitum in a petri dish, and 40/60% sucrose/water solution in a gravity feeder.  
345 Food was replenished every two days, and feeders thoroughly cleaned prior to refill (Table S10 for colony  
346 consumption). During Phase I (days 1-21; Figure 1; Figure S3), we conducted daily checks of all newly  
347 eclosed bees and marked each using a white paint pen (uni Posca, PC.5M 1.8-2.5mm), allowing us to  
348 distinguish between newly eclosed workers during Phase II (day 22 onwards) from eclosed workers before  
349 this. Colonies were checked daily for males, gynes or dead individuals which were removed and frozen at  
350 -20°C.

351

### 352 *Experimental setup*

353 On arrival, colonies were randomly assigned to the four treatments, with no significant difference in the  
354 number of workers between treatments (ANOVA:  $F_{3,22}=1.04$ ,  $p=0.40$ ). Mean worker thorax width was  
355 similar between treatments (LMM,  $p>0.07$ ) with *control* being 4.23mm (range=3.29-5.17), *pre-eclosion*  
356 4.16mm (3.09-5.12), *post-eclosion* 4.28mm (3.14-5.63) and *continual* 4.33mm (3.36-5.34). Monitoring  
357 overall development of workers in colonies, we implemented a fully factorial design with our colony  
358 treatments comprising a combination of two exposure phases: Phase I encompassing the majority of  
359 brood (larval & pupal) development period and Phase II comprising the early adult development period  
360 (up to 12 days). Phase I exposure period started two days after colonies arrived and lasted for 21 days  
361 approximating development time from an egg or very small larva to adult eclosion (Alford, 1975; Cnaani  
362 et al., 2002; Duchateau and Velthuis, 1988). This ensured that all sampled adults will have been  
363 exposed/unexposed in a standardised manner during the vast majority of brood development (Figure S3).  
364 On the 22<sup>nd</sup> day Phase II started, during which we checked daily for callow workers (adults recently eclosed  
365 from their pupal case) and tagged each with a unique numbered Opalith tag using superglue. On tagging,  
366 we randomly assigned half of the workers per colony per day to the 3-day cohort and remaining half to  
367 the 12-day cohort, with tag ID used to correctly remove for testing 3 or 12 days later. Tagging period lasted

368 11 days to provide us with a high number of workers to test (Table S2). This window of opportunity  
369 approximates the minimum time of pupal development, in which pupae evacuate their gut and stop  
370 feeding (Cnaani et al., 2002), allowing us to standardised pesticide exposure as best possible across all  
371 tested workers. Adult workers aged 3 and 12-days after eclosion were chosen to be tested as brain  
372 development has been reported to occur both during brood and early adult stages (Farris et al., 2001;  
373 Jones et al., 2013).

374 We applied four treatments to colonies: *control* = phases I & II unexposed (n=5 colonies); *pre-eclosion* =  
375 phase I exposed to Imidacloprid, phase II unexposed (n = 6); *post-eclosion* = phase I unexposed, phase II  
376 exposed to Imidacloprid (n = 6); *continual* = phases I & II exposed to Imidacloprid (n = 5). The neonicotinoid  
377 imidacloprid was used as: i) it is widely used across the globe (Casida, 2018; Cressey, 2017; Mitchell et al.,  
378 2017; Zhang, 2018); ii) it targets nAChE receptors found in insect brains (Jeschke and Nauen, 2008; Palmer  
379 et al., 2013); iii) exposure has been shown to affect bee foraging and navigation known to be reliant on  
380 learning ability and working memory (Feltham et al., 2014; Fischer et al., 2014; Gill and Raine, 2014;  
381 Samuelson et al., 2016; Stanley and Raine, 2016). The imidacloprid treated sucrose solution provisioned  
382 to the colony was made from a primary stock solution (1mg/ml) consisting of 100mg of imidacloprid  
383 (powder; grade: PESTANAL<sup>®</sup>, analytical standard; brand: Fluka) dissolved in 100ml of acetone. An aliquot  
384 was then added to a 40/60% sucrose/water solution to produce a 5ppb imidacloprid solution of required  
385 volume. A *control* sucrose solution was made by repeating this process but a same aliquot volume of pure  
386 acetone.

387  
388 *Assessing olfactory learning performance using proboscis extension reflex (PER) conditioning*

389 The proboscis extension reflex (PER) conditioning paradigm we implemented was adapted from a  
390 previously reported setup on bumblebees (Stanley et al., 2015). On removal from the colony, workers  
391 were harnessed (between 13:00-14:00) using a modified 2ml centrifuge tube and a split pin yoke, under

392 natural light in the lab and left for 2hrs to settle (Figure S1 for harness setup). All bees were then fed to  
393 satiety using a Gilmont® syringe to present 40% sucrose solution droplets directly to the mouthparts and  
394 left for 18 hours (overnight) in a separate controlled environment room under identical conditions as the  
395 rearing room. For unknown reasons, 24 workers did not survive overnight and were excluded from any  
396 data analysis. Between 08:00-09:00 the PER testing began on the remaining bees (n=413) by first testing  
397 their PER responsiveness to a 50% sucrose solution. Immediately after, each bee was fed a small droplet  
398 (0.8µl) of the sucrose solution for motivation 15 minutes before the start of the PER test (Figure S1).

399 PER conditioning was conducted in front of a filtered ventilation system (Expo Drills & Tools AB500  
400 Extractor fan), preventing the odour coming in to contact with neighbouring harnessed bees. Each bee  
401 was initially conditioned by exposure to clean air for 5 seconds, followed by scented air for 10 seconds. A  
402 harnessed bee was positioned 3 cm away from a glass odour tube, with the airflow delivered at a constant  
403 rate of 80 ml/second (Tetra APS – 100), which was channelled through either a ‘clean’ unscented odour  
404 tube or diverted through a ‘scented’ odour tube containing a piece of filter paper (5 x 20 mm) impregnated  
405 with 1 µl of lemon essential oil (Naturally Thinking Ltd.). Airflow between the clean and scented tube was  
406 controlled by a solenoid valve (Nass Magnet 108-030-0257 24vAC/12vDC) connected to a Raspberry Pi 2  
407 (Model B) computer to ensure each bee was exposed to a consistent amount of clean and scented air. To  
408 develop an association between the lemon odour and the reward, we touched the bee’s antennae with a  
409 droplet of 0.8 µl of 50% sucrose 6 seconds into the 10 second odour delivery phase and allowed the bee  
410 to feed.

411 Following trial 1, the odour and reward presentation sequence was repeated to each adult an additional  
412 nine times. The inter-trial interval (ITI) per individual was 10 minutes allowing us to conduct the PER  
413 testing in batches of up to 20 workers. We waited 15 seconds after the odour and reward presentation  
414 sequence before moving to the next individual (Smith and Burden, 2014). We recorded whether the bees  
415 showed a PER to the odour stimulus prior to or after the reward, which were defined as a learnt or non-

416 learnt response respectively. This provided a number of learnt responses achieved by each worker over  
417 the nine trials, enabling us to estimate the probability per trial of workers demonstrating a learnt response  
418 for each treatment. If a bee responded to the initial conditioning trial (trial 1) before the reward had been  
419 presented (n=24) the individual was excluded from the experimental analyses. If a bee showed no PER  
420 (did not feed) even after the reward was provided, and exhibited this over the next three consecutive  
421 trials, the individual was removed from testing from that point and categorised as a non-learner.

422

### 423 *Micro-CT scanning*

424 Linking variation in learning to differences in brain growth requires high-resolution imaging technology  
425 that can explore minute changes to soft tissue. Using traditional histological methods would have been  
426 technically challenging as it relies on physical extraction from the headcase followed by tissue fixation,  
427 dehydration, embedding and sectioning (Simmons and Swanson, 2009) increasing the risk of destructive  
428 sampling. Potentially this could have caused a greater change to neuropil volume than the experimental  
429 treatment itself. We attempted to overcome such challenges by using micro-computed tomography ( $\mu$ -  
430 CT) scanning.

431 Following the PER assay, bees were humanely sacrificed by swiftly decapitating the live individual using a  
432 disposable surgery scalpel and heads immediately fully submerged in a 70/30% ethanol/de-ionised water  
433 solution in separate 1.5ml centrifuge tubes and stored at 5°C. Preparation of the heads followed precisely  
434 the published protocol by Smith et al. (2016) with the soft brain tissue being stained for seven days with  
435 phosphotungstic acid (PTA) before being CT scanned at a voxel size of 3.5 - 4  $\mu$ m using a Nikon Metrology  
436 HMX ST 225 system (Nikon Metrology, Tring, UK). The staining and scanning methodology we employed  
437 has been shown to give us confidence in the accuracy of our measurements of these complex neuropil  
438 structures (Smith et al., 2016). The raw  $\mu$ CT data for each brain scan was reconstructed using CTPro 2.1  
439 software (Nikon Metrology, Tring, UK) and processed using VG Studio Max 2.1 (Volume Graphics GmbH,

440 Heidelberg, Germany). Each 3D reconstructed scan was then re-oriented to the same optimum plane-of-  
441 view for visualization, and for the neuropils in question we re-sliced into a new series of 2D images. For  
442 each sample, scan images were exported as 8-bit BMP image series at a standardized voxel size of 4  $\mu\text{m}$ .  
443 In total, 92 worker brains were  $\mu\text{CT}$  scanned, but based on staining quality and that both left and right  
444 structures could be segmented (including both medial and lateral calyx for the mushroom body calyces)  
445 we successfully segmented the mushroom bodies for 78 workers, central body for 88, antennal lobes for  
446 89, medullas for 71 and lobulas for 71 (Table S4). For the purposes of comparing relative volumes  
447 (absolute volume divided by ITD to correct for body size), bees were originally sampled to have a balanced  
448 representation across treatments and age but blind of learning performance.

449

#### 450 *Neuropil volume measurements*

451 Segmentation and volume analysis of brain structures was carried out using the software SPIERS 2.20  
452 (Serial Paleontological Image Editing and Rendering System). For segmentation, scan slices were  
453 converted to binary threshold images (of white active pixels and black inactive pixels) adjusted to achieve  
454 an optimum ratio of active white pixels that comprise the structure of interest, and inactive black pixels  
455 for the surrounding tissue. For each component structure, looped splines were placed around the active  
456 pixels at regular five slice intervals which were then interpolated across all slices between the intervals,  
457 so that each structure could be defined as an independent object for 3D reconstruction and volumetric  
458 calculation (for full segmentation protocol see Smith et al. 2016). This soft tissue segmentation protocol  
459 has been shown to provide repeatable and precise volumetric measurements of morphological structures  
460 of the bumblebee brain. To calculate absolute volume of each structure we used the voxel count function  
461 in SPIERS Edit, with relative volume calculated by dividing by the inter-tegula width (standard proxy for  
462 body size (Cane, 1987)). Inter-tegula width was measured using digital callipers (Workzone<sup>®</sup>) with the  
463 mean of two repeated measurements used. A single value was used in our analyses for each of the

464 mushroom bodies, antennal lobes, lobulas and medullas by summing the volume of the left and right  
465 paired structures.

466

#### 467 **Data Analysis**

468 Statistical analyses were conducted in R version 3.5.1 (R Development Core Team 2018) using RStudio  
469 version 1.1.463, with models implemented using the lme4 package (Bates et al., 2015). For all models we  
470 included *treatment* as a fixed categorical factor. We considered measure of bee body size (*ITD*) as a  
471 continuous variable and *colony* as a random factor in our models if inclusion increased the fit of the model  
472 (model comparisons were assessed by comparing the AIC) otherwise they were not retained. For  
473 responsiveness and learning the data was analysed using the proportion of individuals showing a response  
474 with a generalized linear model (glm) using a binomial distribution and included the categorical variable  
475 *age* (3 or 12-day) as an additional fixed factor with *age x treatment* interaction term removed as it showed  
476 no significant effect. For looking at the proportion of learners by trial we used a linear mixed effects model  
477 (lmer) in which treatment consisted of two categories, *control* workers and pesticide workers (pooled  
478 from all three pesticide treatments due to low sample sizes per treatment). We considered a second order  
479 polynomial fit for *trial* number and individual *ID* as a random factor. For relative neuropil volumes we used  
480 a linear mixed-effects model (LMER) that included *age*, *ITD* and *colony* (random effect). We used a  
481 binomial generalised linear model (glm) to analyse how calyces' volume influenced the learning score, as  
482 a proportion of the maximum learning score that could be achieved using calyces volume to analyse the  
483 *calyces volume x treatment* interaction on score.

484

#### 485 **Author Contributions**

486 RJG conceived the project; DBS & RJG designed the experiment; DBS, ARR & PHB conducted the  
487 experiment; DBS & FA carried out the  $\mu$ CT scanning; DBS & DB reconstructed and segmented the brains;

488 ANA, DBS & RJG performed data analyses; DBS & RJG wrote the manuscript and ANA provided critical  
489 feedback.

#### 490 **Acknowledgements**

491 We thank Russell Garwood for help using SPIERS software, Dan Sykes and Amin Garbout for help with the  
492  $\mu$ CT scanning protocol, Paul Beasley for technical support, Alfredo Sánchez Tójar and Peter Graystock for  
493 advice on data analysis, and Richard Abel, Mark Brown, Inti-Pedroso, Nigel Raine and Seirian Sumner for  
494 advice on pilot work. This work was supported by NERC grants (NE/L00755X/1 & NE/P012574/1) awarded  
495 to RJG which funded ANA and ARR. DBS's PhD was supported by a NERC funded SSCP DTP scholarship in  
496 affiliation with the Grantham Institute at Imperial College London. RJG is supported by Imperial College's  
497 Grand Challenges in Ecosystems and the Environment initiative.

498

499



500

## Supplementary Figures

501

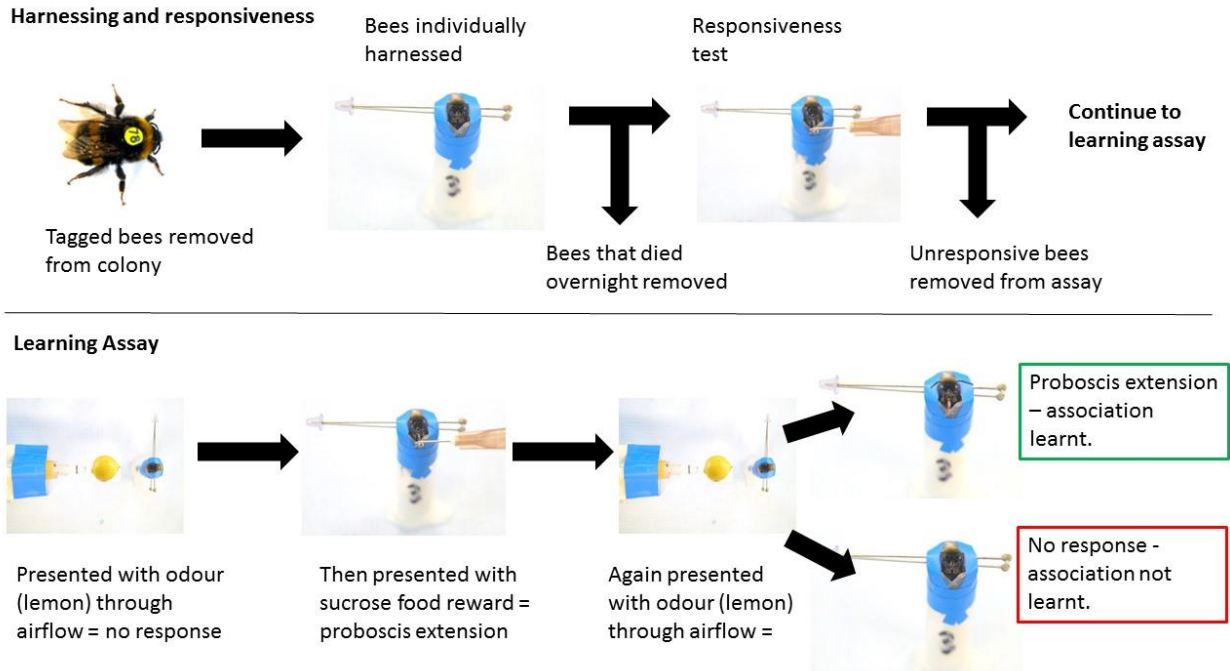

502

503 **Figure S1. Proboscis extension reflex assay setup and step-by-step guide.** Individuals were placed inside  
504 a plastic test tube and the tube was placed on ice for 10 minutes. Individuals were then harnessed in  
505 modified 2ml centrifuge tubes and a split pin yoke held them in place with electrical tape (blue). Harnessed  
506 bees were always placed the same distance from the air flow odour source and an extractor fan was  
507 mounted behind to remove excess odour.

508

509

510

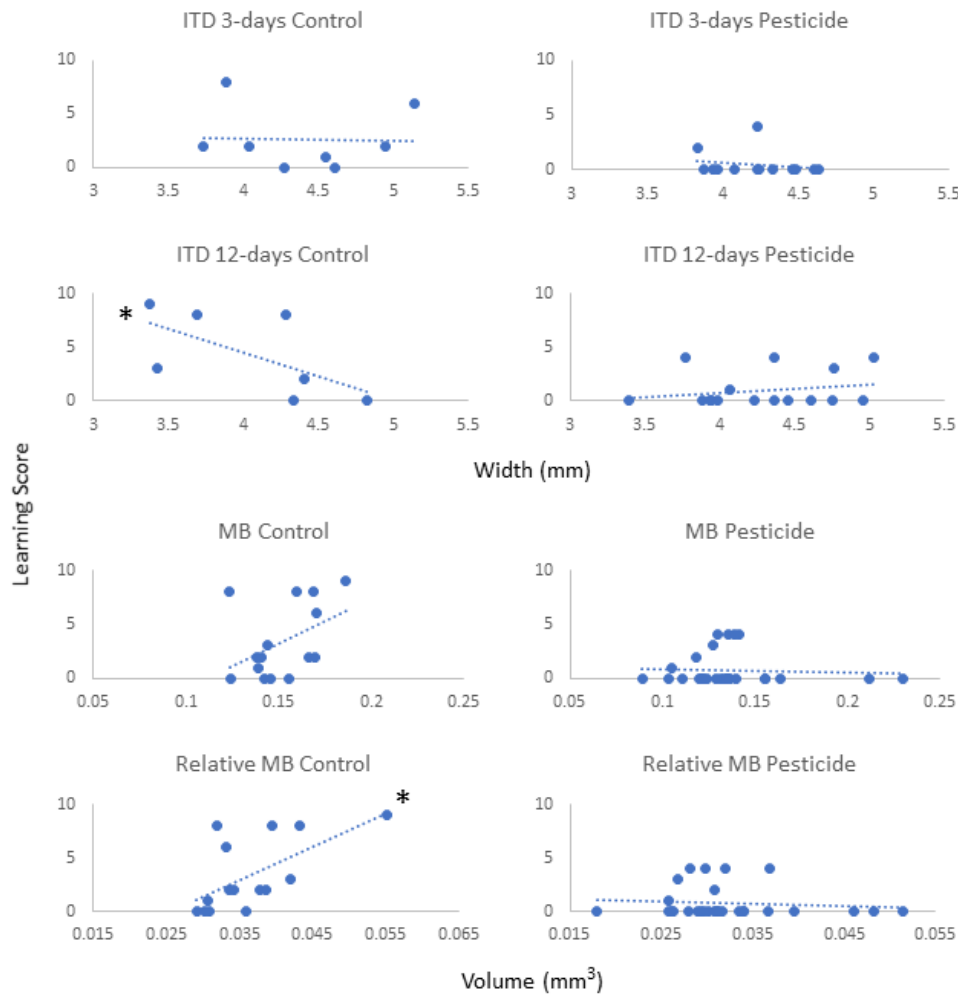

511

512 **Figure S2. Predictor variables individual body size and mushroom body (MB) volumes were plotted**  
513 **against respective learning scores.** The effect of width (mm) of the intertegula distance (ITD; proxy for  
514 body size) for 3-day and 12-day adult workers are shown. The absolute and relative (corrected for body  
515 size) whole mushroom body volumes (mm<sup>3</sup>), representing the combined volumes of the left and right  
516 hemispheres, for all workers regardless of age are shown. Filled circles represent the raw data with a  
517 dashed trend line fitted. Asterisks denote a significant negative or positive relationship ( $\alpha=0.05$ ) based on  
518 a Spearman's Rank correlation analysis (detailed in Table S8).

519

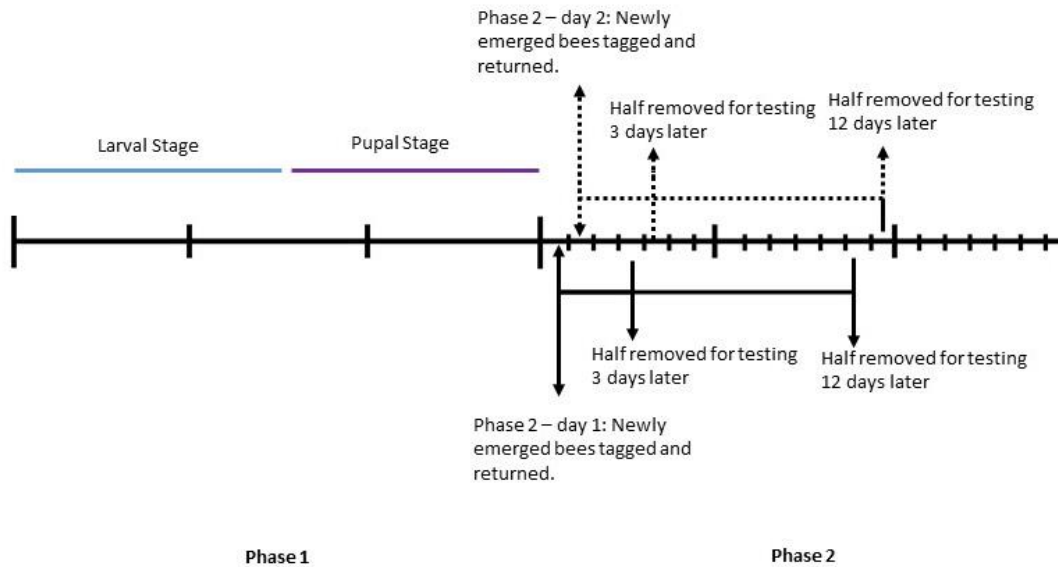

520

521 **Figure S3. Sampling for 3 and 12-day adult cohorts.** During Phase I: all newly eclosed bees were marked  
522 using a white paint pen, but this also represents the developmental time of workers with our sampled  
523 bees having been larvae (blue) and pupae (purple) during this 21 day development period. Phase II: for 11  
524 days, colonies were checked daily with any newly eclosed workers being tagged and returned to their  
525 natal colony with half randomly assigned to a 3-day cohort and the other half a 12-days cohort. The  
526 respective cohorts were then removed 3 days or 12 days later. This continual tagging and sampling over  
527 the 11 day period provided us with a large number of workers to test (here we provide an example for  
528 the first two days for demonstration purposes).

529

530

531

532

## Supplementary Tables

533

534 **Table S1** Informed from honeybee studies, our study focused on five key neuropils considered to be  
535 involved in the following primary functional roles.

| Structure                             | Function                                                                                                                                                                    | References                                                                                                                                              |
|---------------------------------------|-----------------------------------------------------------------------------------------------------------------------------------------------------------------------------|---------------------------------------------------------------------------------------------------------------------------------------------------------|
| Mushroom Bodies                       | Associated with higher cognition and learning with the processing of multimodal sensory information. Possess distinct sub-compartments each with functional specialisation. | (Durst et al., 1994; Fahrbach, 2006; Farris et al., 2001; Hammer and Menzel, 1995; Heisenberg, 2003, 1998; Mobbs, 2006; Zars, 2000)                     |
| Antennal Lobes                        | Principle olfactory centre associated with processing of chemical stimuli.                                                                                                  | (Hansson and Anton, 2002)                                                                                                                               |
| Medullas & Lobulas (optic lobes)      | Processing of visual information                                                                                                                                            | (Dyer et al., 2011; Lotto and Chittka, 2005; A. C. Paulk et al., 2009; Angelique C. Paulk et al., 2009; Paulk et al., 2008; Pfeiffer and Homberg, 2013) |
| Central Body (a.k.a. fan shaped body) | Considered involved in locomotion and orientation                                                                                                                           | (Li et al., 2009; Pfeiffer and Homberg, 2013; Strauss, 2002)                                                                                            |

536

537

538

539 **Table S2. Number of 3- and 12-day adult workers from each colony that were prepared for tested using**  
 540 **our PER setup.** ‘Tagged’ = number of newly emerged workers that were tagged with a unique colour and  
 541 numbered Opalith tag; ‘Survived to Harnessing’ = number of tagged workers survived to 3- or 12-days  
 542 post-emergence and could be harnessed for the PER assay; ‘Harnessed & survived overnight’ = number of  
 543 workers that were harnessed but also were alive inside the harness the next day (n=24 died overnight);  
 544 ‘Responsive’ = number of workers that exhibited a PER response on touching the antenna with a 50%  
 545 sucrose solution droplet; ‘Considered for PER assay’ = the number of workers remaining once any workers  
 546 showing a PER to the lemon odour and before the sucrose provision on the 1<sup>st</sup> trial were removed;  
 547 ‘Learner’ = number of workers that showed at least one olfactory conditioned PER response over the ten  
 548 trials.

549

| Treatment            | Colony        | Tagged     |            | Survived to harnessing |            | Harnessed & survived overnight |            | Responsive |            | Considered for PER assay |            | Learner   |           |
|----------------------|---------------|------------|------------|------------------------|------------|--------------------------------|------------|------------|------------|--------------------------|------------|-----------|-----------|
|                      |               | 3          | 12         | 3                      | 12         | 3                              | 12         | 3          | 12         | 3                        | 12         | 3         | 12        |
| <i>control</i>       | 1             | 16         | 29         | 15                     | 29         | 13                             | 11         | 9          | 8          | 7                        | 5          | 5         | 4         |
| <i>control</i>       | 2             | 18         | 40         | 17                     | 40         | 16                             | 17         | 9          | 9          | 8                        | 7          | 3         | 7         |
| <i>control</i>       | 3             | 13         | 22         | 13                     | 21         | 12                             | 10         | 6          | 6          | 4                        | 5          | 2         | 1         |
| <i>control</i>       | 13            | 18         | 22         | 18                     | 21         | 17                             | 13         | 7          | 12         | 4                        | 8          | 1         | 6         |
| <i>control</i>       | 14            | 0          | 2          | 0                      | 2          | 0                              | 1          | 0          | 0          | 0                        | 0          | 0         | 0         |
|                      |               | <b>65</b>  | <b>115</b> | <b>63</b>              | <b>113</b> | <b>58</b>                      | <b>52</b>  | <b>31</b>  | <b>35</b>  | <b>23</b>                | <b>25</b>  | <b>11</b> | <b>18</b> |
| <i>pre-eclosion</i>  | 4             | 9          | 7          | 9                      | 7          | 9                              | 5          | 4          | 2          | 4                        | 2          | 1         | 0         |
| <i>pre-eclosion</i>  | 5             | 21         | 26         | 21                     | 25         | 20                             | 19         | 10         | 11         | 10                       | 11         | 4         | 1         |
| <i>pre-eclosion</i>  | 6             | 9          | 4          | 8                      | 4          | 8                              | 3          | 3          | 1          | 3                        | 1          | 1         | 0         |
| <i>pre-eclosion</i>  | 15            | 17         | 24         | 16                     | 21         | 16                             | 15         | 5          | 11         | 4                        | 11         | 0         | 1         |
| <i>pre-eclosion</i>  | 16            | 6          | 12         | 6                      | 12         | 6                              | 8          | 2          | 6          | 2                        | 6          | 0         | 1         |
| <i>pre-eclosion</i>  | 17            | 4          | 4          | 4                      | 4          | 4                              | 3          | 2          | 2          | 2                        | 2          | 0         | 0         |
|                      |               | <b>66</b>  | <b>77</b>  | <b>64</b>              | <b>73</b>  | <b>63</b>                      | <b>53</b>  | <b>26</b>  | <b>33</b>  | <b>25</b>                | <b>33</b>  | <b>6</b>  | <b>3</b>  |
| <i>post-eclosion</i> | 7             | 4          | 2          | 4                      | 2          | 4                              | 2          | 1          | 0          | 1                        | 0          | 0         | 0         |
| <i>post-eclosion</i> | 8             | 14         | 28         | 14                     | 27         | 11                             | 12         | 5          | 7          | 5                        | 7          | 2         | 1         |
| <i>post-eclosion</i> | 9             | 11         | 11         | 11                     | 11         | 11                             | 7          | 5          | 4          | 4                        | 4          | 2         | 1         |
| <i>post-eclosion</i> | 18            | 19         | 28         | 19                     | 26         | 18                             | 16         | 2          | 8          | 2                        | 7          | 0         | 1         |
| <i>post-eclosion</i> | 19            | 11         | 17         | 11                     | 15         | 9                              | 9          | 3          | 8          | 3                        | 7          | 0         | 4         |
| <i>post-eclosion</i> | 20            | 4          | 9          | 4                      | 6          | 4                              | 5          | 2          | 2          | 2                        | 2          | 0         | 0         |
|                      |               | <b>63</b>  | <b>95</b>  | <b>63</b>              | <b>87</b>  | <b>57</b>                      | <b>51</b>  | <b>18</b>  | <b>29</b>  | <b>17</b>                | <b>27</b>  | <b>4</b>  | <b>7</b>  |
| <i>continual</i>     | 10            | 15         | 39         | 15                     | 35         | 11                             | 10         | 4          | 2          | 3                        | 2          | 0         | 0         |
| <i>continual</i>     | 11            | 13         | 16         | 13                     | 15         | 12                             | 8          | 5          | 2          | 4                        | 2          | 1         | 1         |
| <i>continual</i>     | 12            | 6          | 4          | 5                      | 4          | 5                              | 2          | 3          | 2          | 3                        | 2          | 2         | 2         |
| <i>continual</i>     | 21            | 14         | 26         | 13                     | 25         | 13                             | 8          | 3          | 8          | 3                        | 8          | 0         | 3         |
| <i>continual</i>     | 23            | 6          | 18         | 6                      | 17         | 6                              | 4          | 1          | 3          | 1                        | 3          | 0         | 1         |
|                      |               | <b>54</b>  | <b>103</b> | <b>52</b>              | <b>96</b>  | <b>47</b>                      | <b>32</b>  | <b>16</b>  | <b>17</b>  | <b>14</b>                | <b>17</b>  | <b>3</b>  | <b>7</b>  |
|                      | <b>Totals</b> | <b>248</b> | <b>390</b> | <b>242</b>             | <b>369</b> | <b>225</b>                     | <b>188</b> | <b>91</b>  | <b>114</b> | <b>79</b>                | <b>102</b> | <b>24</b> | <b>35</b> |
|                      |               |            | <b>638</b> |                        | <b>611</b> |                                | <b>413</b> |            | <b>205</b> |                          | <b>181</b> |           | <b>59</b> |

550

551

552

553 **Table S3. Statistical comparisons of responsiveness and learning. a-b)** statistical outputs from binomial  
 554 Generalized Linear Model in R (GLM) when analysing the proportion of workers that showed a PER  
 555 response to a sucrose droplet prior to undertaking the learning assay, and the proportion of workers  
 556 showing at least one olfactory conditioned PER learnt response during trials 2-10 of the learning assay.  
 557 Exposure treatments are comparisons to *control* workers ('intercept') with *age* (3 versus 12-day workers)  
 558 and ITD (inter-tegula distance which is a proxy for body size) considered. For both models the interaction  
 559 term between pesticide treatment and age was removed as no significant effect could be detected. **c)**  
 560 statistical output from a binomial Linear Mixed Effects Model in R (LMER) when analysing the proportion  
 561 of workers that showed a PER response over the PER assay trials. For this model all workers from the three  
 562 pesticide exposure treatments were pooled to compare one cohort against *control* workers (intercept). A  
 563 2<sup>nd</sup> order polynomial relationship was found to be the best fit to the data. Significant differences ( $\alpha=0.05$ )  
 564 are highlighted in bold.

| <b>a) Responsive</b>                                                              |          |            |         |                  |
|-----------------------------------------------------------------------------------|----------|------------|---------|------------------|
| GLM(responsive(y/n) ~ treatment + age + ITD, family = binomial)                   |          |            |         |                  |
|                                                                                   | Estimate | Std. Error | z value | Pr(> z )         |
| (Intercept)                                                                       | -1.279   | 0.959      | -1.333  | 0.182            |
| pre-eclosion                                                                      | -0.342   | 0.276      | -1.242  | 0.214            |
| post-eclosion                                                                     | -0.714   | 0.282      | -2.529  | <b>0.011</b>     |
| continual                                                                         | -0.737   | 0.307      | -2.400  | <b>0.016</b>     |
| age                                                                               | 0.842    | 0.205      | 4.101   | <b>&lt;0.001</b> |
| ITD                                                                               | 0.306    | 0.218      | 1.406   | 0.160            |
| <b>b) Learners</b>                                                                |          |            |         |                  |
| GLM(learner(y/n) ~ treatment + age + ITD, family = binomial)                      |          |            |         |                  |
| (Intercept)                                                                       | -3.865   | 1.820      | -2.123  | 0.034            |
| pre-eclosion                                                                      | -2.086   | 0.476      | -4.382  | <b>&lt;0.001</b> |
| post-eclosion                                                                     | -1.663   | 0.476      | -3.490  | <b>&lt;0.001</b> |
| continual                                                                         | -1.409   | 0.507      | -2.778  | <b>0.005</b>     |
| age                                                                               | 0.413    | 0.360      | 1.147   | 0.251            |
| ITD                                                                               | 0.953    | 0.413      | 2.308   | <b>0.021</b>     |
| <b>c) Learners by trial</b>                                                       |          |            |         |                  |
| LMER(learner(y/n) ~ treatment + poly(trial,2) + (1 worker_id), family = binomial) |          |            |         |                  |
| (Intercept)                                                                       | -0.889   | 0.308      | -2.887  | 0.004            |
| pesticide_treatments                                                              | -0.861   | 0.413      | -2.083  | <b>0.037</b>     |
| poly(trial, 2)1                                                                   | 48.427   | 5.398      | 8.972   | <b>&lt;0.001</b> |
| poly(trial, 2)2                                                                   | -18.909  | 3.965      | -4.769  | <b>&lt;0.001</b> |

565

566

567 **Table S4. Average volumes (mm<sup>3</sup>) of segmented brain neuropils using  $\mu$ CT scanning for each**  
 568 **experimental treatment and age cohort.** Mean ( $\pm$  s.e.m.) values are based on workers across all colonies  
 569 and represent relative volumes (absolute volume divided by workers size). The percentage difference (%  
 570 diff.) of the mean of each pesticide treatment relative to the control group is provided with negative  
 571 values showing smaller and positive values showing larger average volumes. Based on the quality of  
 572 staining and scanning, sample sizes (n) for each neuropil were limited to those that had both structures  
 573 from the left and right brain hemispheres successfully segmented. (N.B. for the *central body* one individual  
 574 (18G) was removed from the analysis as it represented an extreme outlier likely caused by a segmentation  
 575 error).

| treatment                    | age | n  | mean     | s.e.m.   | % diff. |    |         |         |         |
|------------------------------|-----|----|----------|----------|---------|----|---------|---------|---------|
| <b>total mushroom bodies</b> |     |    |          |          |         |    |         |         |         |
| control                      | 3   | 9  | 0.1413   | 0.0057   |         |    |         |         |         |
| pre-eclosion                 | 3   | 11 | 0.1402   | 0.0094   | -0.8    |    |         |         |         |
| post-eclosion                | 3   | 10 | 0.1166   | 0.0051   | -17.5   |    |         |         |         |
| continual                    | 3   | 11 | 0.1306   | 0.0105   | -7.5    |    |         |         |         |
| control                      | 12  | 8  | 0.1607   | 0.0050   |         |    |         |         |         |
| pre-eclosion                 | 12  | 11 | 0.1307   | 0.0076   | -18.7   |    |         |         |         |
| post-eclosion                | 12  | 10 | 0.1287   | 0.0079   | -19.9   |    |         |         |         |
| continual                    | 12  | 8  | 0.1346   | 0.0065   | -16.2   |    |         |         |         |
| <b>mushroom body calyces</b> |     |    |          |          |         |    |         |         |         |
| control                      | 3   | 9  | 0.0916   | 0.0045   |         |    |         |         |         |
| pre-eclosion                 | 3   | 11 | 0.0897   | 0.0037   | -2.0    |    |         |         |         |
| post-eclosion                | 3   | 10 | 0.0733   | 0.0056   | -20.0   |    |         |         |         |
| continual                    | 3   | 11 | 0.0813   | 0.0040   | -11.3   |    |         |         |         |
| control                      | 12  | 8  | 0.1040   | 0.0030   |         |    |         |         |         |
| pre-eclosion                 | 12  | 11 | 0.0819   | 0.0050   | -21.2   |    |         |         |         |
| post-eclosion                | 12  | 10 | 0.0813   | 0.0069   | -21.8   |    |         |         |         |
| continual                    | 12  | 8  | 0.0852   | 0.0039   | -18.0   |    |         |         |         |
| <b>mushroom body lobes</b>   |     |    |          |          |         |    |         |         |         |
|                              |     |    |          |          |         | n  | mean    | s.e.m.  | % diff. |
| control                      |     |    |          |          |         | 10 | 0.0496  | 0.0013  |         |
| pre-eclosion                 |     |    |          |          |         | 11 | 0.0504  | 0.0039  | 1.6     |
| post-eclosion                |     |    |          |          |         | 13 | 0.0453  | 0.0022  | -8.7    |
| continual                    |     |    |          |          |         | 13 | 0.0485  | 0.0032  | -2.3    |
| control                      |     |    |          |          |         | 10 | 0.0569  | 0.0017  |         |
| pre-eclosion                 |     |    |          |          |         | 11 | 0.0487  | 0.0039  | -14.3   |
| post-eclosion                |     |    |          |          |         | 11 | 0.0480  | 0.0029  | -15.7   |
| continual                    |     |    |          |          |         | 9  | 0.0486  | 0.0026  | -14.5   |
| <b>central body</b>          |     |    |          |          |         |    |         |         |         |
| control                      | 3   | 10 | 0.000597 | 0.000031 |         |    |         |         |         |
| pre-eclosion                 | 3   | 12 | 0.000555 | 0.000040 | -7.0    |    |         |         |         |
| post-eclosion                | 3   | 13 | 0.000582 | 0.000041 | -2.6    |    |         |         |         |
| continual                    | 3   | 14 | 0.000586 | 0.000029 | -1.9    |    |         |         |         |
| control                      | 12  | 10 | 0.000645 | 0.000046 |         |    |         |         |         |
| pre-eclosion                 | 12  | 9  | 0.000599 | 0.000514 | -10.1   |    |         |         |         |
| post-eclosion                | 12  | 11 | 0.000584 | 0.000067 | -9.5    |    |         |         |         |
| continual                    | 12  | 9  | 0.000607 | 0.000023 | -5.9    |    |         |         |         |
| <b>antennal lobes</b>        |     |    |          |          |         |    |         |         |         |
| control                      |     |    |          |          |         | 10 | 0.00522 | 0.00020 |         |
| pre-eclosion                 |     |    |          |          |         | 12 | 0.00509 | 0.00020 | -2.4    |
| post-eclosion                |     |    |          |          |         | 13 | 0.00418 | 0.00013 | -20.0   |
| continual                    |     |    |          |          |         | 14 | 0.00479 | 0.00019 | -8.3    |
| control                      |     |    |          |          |         | 10 | 0.00590 | 0.00035 |         |
| pre-eclosion                 |     |    |          |          |         | 10 | 0.00581 | 0.00070 | -1.5    |
| post-eclosion                |     |    |          |          |         | 11 | 0.00516 | 0.00036 | -12.6   |
| continual                    |     |    |          |          |         | 9  | 0.00467 | 0.00018 | -20.9   |
| <b>lobulas</b>               |     |    |          |          |         |    |         |         |         |
| control                      | 3   | 7  | 0.00816  | 0.00035  |         |    |         |         |         |
| pre-eclosion                 | 3   | 11 | 0.00866  | 0.00175  | 6.1     |    |         |         |         |
| post-eclosion                | 3   | 10 | 0.00844  | 0.00083  | 3.4     |    |         |         |         |
| continual                    | 3   | 8  | 0.00933  | 0.00199  | 14.4    |    |         |         |         |
| control                      | 12  | 9  | 0.00938  | 0.00115  |         |    |         |         |         |
| pre-eclosion                 | 12  | 10 | 0.00981  | 0.00197  | 4.6     |    |         |         |         |
| post-eclosion                | 12  | 8  | 0.00970  | 0.00137  | 3.4     |    |         |         |         |
| continual                    | 12  | 8  | 0.00906  | 0.00078  | -3.4    |    |         |         |         |
| <b>medullas</b>              |     |    |          |          |         |    |         |         |         |
| control                      |     |    |          |          |         | 7  | 0.0252  | 0.0009  |         |
| pre-eclosion                 |     |    |          |          |         | 11 | 0.0261  | 0.0013  | 3.7     |
| post-eclosion                |     |    |          |          |         | 10 | 0.0262  | 0.0011  | 4.0     |
| continual                    |     |    |          |          |         | 8  | 0.0293  | 0.0029  | 16.5    |
| control                      |     |    |          |          |         | 9  | 0.0280  | 0.0014  |         |
| pre-eclosion                 |     |    |          |          |         | 10 | 0.0275  | 0.0020  | -1.8    |
| post-eclosion                |     |    |          |          |         | 8  | 0.0305  | 0.0015  | 9.0     |
| continual                    |     |    |          |          |         | 8  | 0.0268  | 0.0009  | -4.5    |

576

577

578 **Table S5. Statistical comparisons of mushroom body relative volumes.** Statistical outputs from a  
 579 Generalized Mixed Effects Model in R (LMER) for the combined volumes of the left and right **a.** whole  
 580 mushroom bodies, **b.** the medial and lateral calyces of the mushroom body together, **c.** lobes of the  
 581 mushroom body for only those individuals that also had the calyces segmented (n=78), **d.** the lobes of the  
 582 mushroom body for any individual that had them segmented (n=88). Exposure treatments are  
 583 comparisons to *control* workers ('intercept') with *age* (3 versus 12-day workers) and ITD (inter-tegula  
 584 distance - proxy for body size) considered. For both models the interaction term between pesticide  
 585 treatment and age was removed as no significant effect could be detected. Significant differences ( $\alpha=0.05$ )  
 586 highlighted in bold black.

587

| <b>a) Total Mushroom Bodies (n=78)</b>                        |          |            |        |         |                  |
|---------------------------------------------------------------|----------|------------|--------|---------|------------------|
| LMER(relativeMB ~ treatment + age + size + (1 colony))        |          |            |        |         |                  |
|                                                               | Estimate | Std. Error | df     | t value | Pr(> t )         |
| (Intercept)                                                   | 0.058    | 0.008      | 43.244 | 7.732   | <0.001           |
| <i>pre-eclosion</i>                                           | -0.004   | 0.002      | 5.845  | -1.822  | 0.120            |
| <i>post-eclosion</i>                                          | -0.007   | 0.002      | 6.166  | -2.873  | <b>0.027</b>     |
| <i>continual</i>                                              | -0.005   | 0.002      | 6.348  | -2.032  | 0.086            |
| <i>age</i>                                                    | 0.002    | 0.001      | 67.913 | 1.473   | 0.145            |
| <i>ITD</i>                                                    | -0.006   | 0.002      | 49.038 | -3.246  | <b>0.002</b>     |
| <b>b) Total Mushroom Body Calyces (n=78)</b>                  |          |            |        |         |                  |
| LMER(relativeMBCalyces ~ treatment + age + size + (1 colony)) |          |            |        |         |                  |
| (Intercept)                                                   | 0.035    | 0.005      | 40.979 | 7.735   | <0.001           |
| <i>pre-eclosion</i>                                           | -0.003   | 0.001      | 6.637  | -2.409  | <b>0.049</b>     |
| <i>post-eclosion</i>                                          | -0.005   | 0.001      | 7.212  | -3.828  | <b>0.006</b>     |
| <i>continual</i>                                              | -0.004   | 0.001      | 7.626  | -2.896  | <b>0.021</b>     |
| <i>age</i>                                                    | 0.001    | 0.001      | 69.152 | 1.565   | 0.122            |
| <i>ITD</i>                                                    | -0.003   | 0.001      | 44.961 | -2.919  | <b>0.005</b>     |
| <b>c) Total Mushroom Body Lobes (n=78)</b>                    |          |            |        |         |                  |
| LMER(relativeMBLobes ~ treatment + age + size + (1 colony))   |          |            |        |         |                  |
| (Intercept)                                                   | 0.024    | 0.003      | 65.458 | 8.182   | <0.001           |
| <i>pre-eclosion</i>                                           | -0.001   | 0.001      | 6.440  | -0.890  | 0.406            |
| <i>post-eclosion</i>                                          | -0.001   | 0.001      | 6.184  | -1.181  | 0.281            |
| <i>continual</i>                                              | -0.001   | 0.001      | 6.350  | -0.936  | 0.383            |
| <i>age</i>                                                    | 0.001    | 0.000      | 74.263 | 1.137   | 0.259            |
| <i>ITD</i>                                                    | -0.003   | 0.001      | 76.887 | -4.285  | <b>&lt;0.001</b> |
| <b>d) Total Mushroom Body Lobes (n=88)</b>                    |          |            |        |         |                  |
| LMER(relativeMBLobes ~ treatment + age + size + (1 colony))   |          |            |        |         |                  |
| (Intercept)                                                   | 0.024    | 0.003      | 53.979 | 7.295   | <0.001           |
| <i>pre-eclosion</i>                                           | -0.001   | 0.001      | 5.995  | -0.865  | 0.421            |
| <i>post-eclosion</i>                                          | -0.002   | 0.001      | 6.217  | -1.387  | 0.213            |
| <i>continual</i>                                              | -0.001   | 0.001      | 6.261  | -0.757  | 0.476            |
| <i>age</i>                                                    | 0.001    | 0.001      | 66.485 | 1.145   | 0.256            |
| <i>ITD</i>                                                    | -0.003   | 0.001      | 63.112 | -3.661  | <b>&lt;0.001</b> |

588



589 **Table S6. Statistical comparisons of the relative volumes of the central body, antennal lobes, lobulas**  
 590 **and medullas.** Statistical outputs are for the combined volumes of the left and right (except the central  
 591 body), from a Generalized Mixed Effects Model in R (LMER). Exposure treatments are comparisons to  
 592 *control* workers ('intercept') with *age* (3 versus 12-day workers) and ITD (inter-tegula distance which is a  
 593 proxy for body size) considered. For both models the interaction term between pesticide treatment and  
 594 age was removed as no significant effect could be detected. Significant differences ( $\alpha=0.05$ ) highlighted  
 595 in bold black.  
 596

| <b>Central Body n=88</b>                                    |           |          |      |       |                  |
|-------------------------------------------------------------|-----------|----------|------|-------|------------------|
| lmer - central Body ~ treatment + age + size + (1 colony)   |           |          |      |       |                  |
|                                                             | Estimate  | s.e.     | df   | t     | p                |
| (Intercept)                                                 | 0.000573  | 0.000176 | 64.7 | 3.26  | 0.002            |
| Pre-eclosion                                                | 0.000074  | 0.000073 | 5.9  | 1.01  | 0.351            |
| Post-eclosion                                               | -0.000002 | 0.000072 | 5.6  | -0.03 | 0.976            |
| Continual                                                   | 0.000001  | 0.000072 | 5.7  | 0.02  | 0.985            |
| age                                                         | 0.000027  | 0.000028 | 74.4 | 0.96  | 0.339            |
| size                                                        | -0.000102 | 0.000038 | 78.4 | -2.67 | <b>0.009</b>     |
| <b>Antennal Lobes n=89</b>                                  |           |          |      |       |                  |
| lmer - antennal lobes ~ treatment + age + size + (1 colony) |           |          |      |       |                  |
| (Intercept)                                                 | 0.003658  | 0.000320 | 63.6 | 11.42 | <0.001           |
| Pre-eclosion                                                | -0.000034 | 0.000133 | 5.5  | -0.26 | 0.807            |
| Post-eclosion                                               | -0.000208 | 0.000130 | 5.3  | -1.60 | 0.168            |
| Continual                                                   | -0.000176 | 0.000131 | 5.3  | -1.35 | 0.232            |
| age                                                         | 0.000101  | 0.000051 | 73.9 | 1.98  | 0.051            |
| size                                                        | -0.000553 | 0.000070 | 77.9 | -7.96 | <b>&lt;0.001</b> |
| <b>Lobulas n=71</b>                                         |           |          |      |       |                  |
| lmer - lobulas ~ treatment + age + size + (1 colony)        |           |          |      |       |                  |
| (Intercept)                                                 | 0.004984  | 0.000493 | 47.1 | 10.11 | <0.001           |
| Pre-eclosion                                                | 0.000052  | 0.000140 | 6.4  | 0.37  | 0.723            |
| Post-eclosion                                               | 0.000034  | 0.000142 | 7.3  | 0.24  | 0.818            |
| Continual                                                   | 0.000057  | 0.000146 | 7.4  | 0.39  | 0.706            |
| age                                                         | 0.000192  | 0.000083 | 61.5 | 2.30  | <b>0.025</b>     |
| size                                                        | -0.000693 | 0.000108 | 52.2 | -6.44 | <b>&lt;0.001</b> |
| <b>Medullas n=71</b>                                        |           |          |      |       |                  |
| lmer - medullas ~ treatment + age + size + (1 colony)       |           |          |      |       |                  |
| (Intercept)                                                 | 0.014020  | 0.001639 | 42.7 | 8.55  | <0.001           |
| Pre-eclosion                                                | -0.000094 | 0.000425 | 6.7  | -0.22 | 0.832            |
| Post-eclosion                                               | 0.000295  | 0.000435 | 8.2  | 0.68  | 0.517            |
| Continual                                                   | 0.000208  | 0.000447 | 8.0  | 0.46  | 0.655            |
| age                                                         | 0.000369  | 0.000287 | 62.5 | 1.29  | 0.203            |
| size                                                        | -0.001826 | 0.000360 | 46.9 | -5.08 | <b>&lt;0.001</b> |

597

598

599

600 **Table S7.** Statistical output from a binomial generalised linear model in R (GLM) when analysing the final  
 601 learning score achieved by each worker by the end of PER assay trials. For this model all workers from the  
 602 three pesticide exposure treatments were pooled to compare one cohort against *control* workers  
 603 (intercept). Significant differences ( $\alpha=0.05$ ) are highlighted in bold.

604

| glm(learning_score ~ relativeMBCalyces*treatment, family = binomial) |          |            |         |                  |
|----------------------------------------------------------------------|----------|------------|---------|------------------|
|                                                                      | Estimate | Std. Error | z value | Pr(> z )         |
| (Intercept)                                                          | -6.992   | 1.416      | -4.939  | <0.001           |
| calyces                                                              | 265.823  | 58.981     | 4.507   | <b>&lt;0.001</b> |
| pesticide                                                            | 5.611    | 1.802      | 3.113   | <b>0.002</b>     |
| calyces*pesticide                                                    | -321.899 | 81.268     | -3.961  | <b>&lt;0.001</b> |

605

606

607

608

609

610 **Table S8. Spearman's rank correlations to investigate the relationship between the response variable**  
 611 **learning score and the predictor variables body size (ITD) or mushroom body volume.** Row 1 is  
 612 intertegula distance (ITD; proxy for body size) for workers regardless of age; Rows 2 & 3 are ITDs for 3 and  
 613 12-day workers (respectively); Rows 4-5 is the absolute volume of the whole mushroom bodies (left and  
 614 right combined), and relative volume of the whole mushroom bodies (left and right combined) corrected  
 615 for body size, respectively; Rows 6-9 also show absolute and relative volumes for the calyces and lobes  
 616 separately (left and right combined). Significant differences ( $\alpha=0.05$ ) are highlighted in bold red, with near  
 617 significant differences ( $\alpha=0.1$ ) in bold black.

| Row | MB Component        | Control |              | Pesticide |       |
|-----|---------------------|---------|--------------|-----------|-------|
|     |                     | SR      | p            | SR        | p     |
| 1   | ITD                 | -0.509  | <b>0.053</b> | 0.020     | 0.919 |
| 2   | ITD 3-Day           | -0.123  | 0.772        | -0.314    | 0.295 |
| 3   | ITD 12-Day          | -0.818  | <b>0.024</b> | 0.171     | 0.527 |
| 4   | MB                  | 0.403   | 0.136        | -0.030    | 0.879 |
| 5   | Relative MB         | 0.690   | <b>0.004</b> | -0.126    | 0.516 |
| 6   | MB Calyces          | 0.354   | 0.195        | -0.047    | 0.807 |
| 7   | Relative MB Calyces | 0.622   | <b>0.013</b> | -0.130    | 0.503 |
| 8   | MB Lobes            | 0.579   | <b>0.024</b> | 0.007     | 0.972 |
| 9   | Relative MB Lobes   | 0.633   | <b>0.011</b> | -0.098    | 0.612 |

618

619 **Table S9. Colony census at start of the experiment, and at the end of each phase.** All workers  
 620 eclosing during Phase II were tagged with a unique colour and numbered Opalith tag so the age of  
 621 each worker was known.

622

| colony# | treatment            | starting<br>#<br>workers | # workers eclosed    |                                        |
|---------|----------------------|--------------------------|----------------------|----------------------------------------|
|         |                      |                          | end of<br>phase<br>I | end of<br>phase II<br>(i.e.<br>tagged) |
| 1       | <i>Control</i>       | 25                       | 27                   | 45                                     |
| 2       | <i>Control</i>       | 17                       | 48                   | 58                                     |
| 3       | <i>Control</i>       | 20                       | 26                   | 35                                     |
| 13      | <i>Control</i>       | 10                       | 28                   | 40                                     |
| 14      | <i>Control</i>       | 17                       | 12                   | 2                                      |
| 4       | <i>Pre-eclosion</i>  | 9                        | 17                   | 16                                     |
| 5       | <i>Pre-eclosion</i>  | 24                       | 23                   | 47                                     |
| 6       | <i>Pre-eclosion</i>  | 18                       | 36                   | 13                                     |
| 15      | <i>Pre-eclosion</i>  | 16                       | 36                   | 41                                     |
| 16      | <i>Pre-eclosion</i>  | 11                       | 19                   | 18                                     |
| 17      | <i>Pre-eclosion</i>  | 8                        | 24                   | 8                                      |
| 7       | <i>Post-eclosion</i> | 12                       | 41                   | 6                                      |
| 8       | <i>Post-eclosion</i> | 20                       | 54                   | 42                                     |
| 9       | <i>Post-eclosion</i> | 20                       | 34                   | 22                                     |
| 18      | <i>Post-eclosion</i> | 15                       | 24                   | 47                                     |
| 19      | <i>Post-eclosion</i> | 12                       | 41                   | 28                                     |
| 20      | <i>Post-eclosion</i> | 7                        | 33                   | 13                                     |
| 10      | <i>Continual</i>     | 12                       | 51                   | 54                                     |
| 11      | <i>Continual</i>     | 14                       | 42                   | 29                                     |
| 12      | <i>Continual</i>     | 17                       | 20                   | 10                                     |
| 21      | <i>Continual</i>     | 13                       | 38                   | 40                                     |
| 22      | <i>Continual</i>     | 6                        | 24                   | 24                                     |

623

624

625

626 **Table S10. Colony daily sucrose consumption (ml) as the experiment progressed (days 1-43).** Of the  
 627 total provisioned sucrose (1,110ml per colony), *control*, *pre-eclosion*, *post-eclosion* and *continual*  
 628 treatments consumed a median (IQR) of 54 (50-56), 47 (37-57), 61 (48-69) and 51 (35-63) %  
 629 respectively.

| Treatment     | Colony # | Consumption (ml) per day |    |    |    |    |    |    |    |    |    |    |    |    |    |    |    |    |    |    |    |    |    |
|---------------|----------|--------------------------|----|----|----|----|----|----|----|----|----|----|----|----|----|----|----|----|----|----|----|----|----|
|               |          | 1                        | 3  | 5  | 7  | 9  | 11 | 13 | 15 | 17 | 19 | 21 | 23 | 25 | 27 | 29 | 31 | 33 | 35 | 37 | 39 | 41 | 43 |
| Control       | 1        | 9                        | 15 | 25 | 15 | 18 | 21 | 20 | 22 | 28 | 34 | 15 | 40 | 30 | 35 | 37 | 37 | 31 | 36 | 35 | 33 | 33 | 37 |
| Control       | 2        | 14                       | 20 | 29 | 17 | 20 | 20 | 29 | 28 | 27 | 33 | 13 | 28 | 28 | 30 | 30 | 34 | 26 | 32 | 35 | 38 | 37 | 35 |
| Control       | 3        | 10                       | 10 | 19 | 14 | 20 | 20 | 21 | 22 | 23 | 30 | 14 | 30 | 28 | 38 | 37 | 38 | 30 | 37 | 35 | 37 | 39 | 39 |
| Pre-eclosion  | 4        | 7                        | 10 | 13 | 10 | 13 | 14 | 15 | 12 | 16 | 19 | 9  | 20 | 17 | 20 | 16 | 17 | 16 | 21 | 21 | 22 | 25 | 26 |
| Pre-eclosion  | 5        | 13                       | 12 | 24 | 18 | 24 | 22 | 20 | 20 | 23 | 26 | 12 | 27 | 25 | 30 | 31 | 32 | 28 | 32 | 30 | 33 | 35 | 35 |
| Pre-eclosion  | 6        | 25                       | 21 | 31 | 24 | 33 | 33 | 31 | 31 | 29 | 39 | 14 | 41 | 34 | 39 | 37 | 40 | 28 | 35 | 37 | 35 | 37 | 45 |
| Post-eclosion | 7        | 13                       | 10 | 29 | 13 | 17 | 18 | 16 | 17 | 20 | 26 | 12 | 26 | 37 | 45 | 46 | 43 | 36 | 43 | 48 | 48 | 54 | 59 |
| Post-eclosion | 8        | 29                       | 22 | 32 | 21 | 24 | 24 | 29 | 23 | 30 | 37 | 14 | 30 | 34 | 39 | 39 | 38 | 32 | 42 | 57 | 42 | 45 | 52 |
| Post-eclosion | 9        | 18                       | 17 | 30 | 23 | 28 | 28 | 35 | 39 | 35 | 39 | 21 | 46 | 42 | 48 | 53 | 52 | 36 | 46 | 52 | 48 | 55 | 55 |
| continual     | 10       | 19                       | 18 | 25 | 20 | 22 | 25 | 27 | 28 | 33 | 35 | 13 | 35 | 35 | 40 | 42 | 46 | 27 | 40 | 36 | 40 | 40 | 35 |
| continual     | 11       | 20                       | 15 | 22 | 24 | 25 | 25 | 28 | 26 | 28 | 32 | 15 | 35 | 35 | 39 | 36 | 46 | 36 | 38 | 35 | 35 | 33 | 32 |
| continual     | 12       | 5                        | 15 | 17 | 12 | 15 | 15 | 21 | 16 | 18 | 25 | 11 | 24 | 1  | 29 | 25 | 28 | 25 | 31 | 33 | 36 | 40 | 41 |
| Control       | 13       | 17                       | 17 | 17 | 23 | 21 | 25 | 21 | 26 | 24 | 28 | 15 | 32 | 30 | 36 | 33 | 35 | 38 | 40 | 39 | 40 | 40 | 41 |
| Control       | 14       | 15                       | 16 | 14 | 17 | 13 | 15 | 16 | 20 | 16 | 21 | 12 | 25 | 23 | 34 | 30 | 31 | 29 | 33 | 33 | 35 | 32 | 34 |
| Pre-eclosion  | 15       | 17                       | 19 | 23 | 26 | 25 | 29 | 24 | 29 | 25 | 29 | 17 | 37 | 28 | 33 | 31 | 31 | 30 | 30 | 26 | 31 | 29 | 31 |
| Pre-eclosion  | 16       | 17                       | 18 | 14 | 23 | 17 | 22 | 18 | 22 | 20 | 24 | 14 | 30 | 27 | 29 | 25 | 25 | 23 | 23 | 22 | 24 | 23 | 23 |
| Pre-eclosion  | 17       | 13                       | 14 | 11 | 19 | 16 | 21 | 19 | 22 | 18 | 20 | 11 | 25 | 21 | 23 | 23 | 23 | 23 | 23 | 21 | 21 | 17 | 19 |
| Post-eclosion | 18       | 15                       | 15 | 15 | 22 | 18 | 22 | 29 | 30 | 19 | 24 | 14 | 28 | 23 | 27 | 36 | 32 | 30 | 28 | 32 | 25 | 27 | 27 |
| Post-eclosion | 19       | 23                       | 23 | 23 | 29 | 25 | 31 | 26 | 36 | 34 | 36 | 21 | 38 | 33 | 38 | 29 | 34 | 34 | 36 | 36 | 34 | 34 | 33 |
| Post-eclosion | 20       | 15                       | 15 | 20 | 26 | 20 | 23 | 22 | 26 | 21 | 26 | 13 | 23 | 22 | 26 | 25 | 29 | 30 | 31 | 28 | 27 | 26 | 26 |
| Continual     | 21       | 18                       | 19 | 19 | 26 | 25 | 29 | 29 | 37 | 30 | 39 | 21 | 42 | 35 | 39 | 41 | 43 | 45 | 46 | 46 | 47 | 45 | 46 |
| Continual     | 22       | 13                       | 13 | 10 | 13 | 10 | 12 | 9  | 10 | 7  | 10 | 4  | 10 | 7  | 12 | 12 | 12 | 12 | 13 | 15 | 16 | 9  | 11 |
| Continual     | 23       | 14                       | 15 | 15 | 21 | 13 | 16 | 16 | 19 | 16 | 19 | 12 | 24 | 22 | 25 | 25 | 25 | 23 | 25 | 24 | 25 | 24 | 26 |

630

631

632

633

634 **REFERENCES**

- 635 Alford D. 1975. Bumblebees. London: Davis-Poynter.
- 636 Aliouane Y, El Hassani AK, Gary V, Armengaud C, Lambin M, Gauthier M. 2009. Subchronic exposure  
637 of honeybees to sublethal doses of pesticides: Effects on behavior. *Environ Toxicol Chem*  
638 **28**:113–122. doi:10.1897/08-110.1
- 639 Andrione M, Vallortigara G, Antolini R, Haase A. 2016. Neonicotinoid-induced impairment of odour  
640 coding in the honeybee. *Sci Rep* **6**:38110. doi:10.1038/srep38110
- 641 Arce AN, David TI, Randall EL, Ramos Rodrigues A, Colgan TJ, Wurm Y, Gill RJ. 2017. Impact of  
642 controlled neonicotinoid exposure on bumblebees in a realistic field setting. *J Appl Ecol*  
643 **54**:1199–1208. doi:10.1111/1365-2664.12792
- 644 Baird E, Taylor G. 2017. X-ray micro computed-tomography. *Curr Biol* **27**:R289–R291.  
645 doi:10.1016/j.cub.2017.01.066
- 646 Barbara GS, Grünewald B, Paute S, Gauthier M, Raymond-Delpech V. 2008. Study of nicotinic  
647 acetylcholine receptors on cultured antennal lobe neurones from adult honeybee brains.  
648 *Invertebr Neurosci* **8**:19–29. doi:10.1007/s10158-007-0062-2
- 649 Baron GL, Jansen VAA, Brown MJF, Raine NE. 2017. Pesticide reduces bumblebee colony initiation  
650 and increases probability of population extinction. *Nat Ecol Evol* **1**:1308–1316.  
651 doi:10.1038/s41559-017-0260-1
- 652 Bates D, Machler M, Bolker B, Walker S. 2015. Fitting linear mixed-effects models using lme4. *J Stat*  
653 *Softw* **67**:1–48.
- 654 Bitterman ME, Menzel R, Fietz A, Schäfer S. 1983. Classical conditioning of proboscis extension in  
655 honeybees (*Apis mellifera*). *J Comp Psychol* **97**:107–119. doi:10.1037/0735-7036.97.2.107
- 656 Botias C, David A, Horwood J, Abdul-Sada A, Nicholls E, Hill E, Goulson D. 2015. Neonicotinoid  
657 residues in wildflowers, a potential route of chronic exposure for bees. *Environ Sci Technol*  
658 **49**:12731–12740. doi:10.1021/acs.est.5b03459
- 659 Brittain C, Potts SG. 2011. The potential impacts of insecticides on the life-history traits of bees and  
660 the consequences for pollination. *Basic Appl Ecol* **12**:321–331. doi:10.1016/j.baae.2010.12.004
- 661 Brittain C, Williams N, Kremen C, Klein A-M. 2013. Synergistic effects of non-*Apis* bees and honey  
662 bees for pollination services. *Proc R Soc B-Biological Sci* **280**. doi:10.1098/rspb.2012.2767
- 663 Bryden J, Gill RJ, Mitton RAA, Raine NE, Jansen VAA. 2013. Chronic sublethal stress causes bee  
664 colony failure. *Ecol Lett* **16**:1463–1469. doi:10.1111/ele.12188
- 665 Cabirol A, Cope AJ, Barron AB, Devaud JM. 2018. Relationship between brain plasticity, learning and  
666 foraging performance in honey bees. *PLoS One* **13**:e0196749.  
667 doi:10.1371/journal.pone.0196749
- 668 Calatayud-Vernich P, Calatayud F, Simó E, Picó Y. 2018. Pesticide residues in honey bees, pollen and  
669 beeswax: Assessing beehive exposure. *Environ Pollut* **241**:106–114.  
670 doi:10.1016/j.envpol.2018.05.062
- 671 Cane JH. 1987. Estimation of bee size using intertegular span (Apoidea). *J Kansas Entomol Soc*  
672 **60**:145–147. doi:10.1098/rstb.2011.0050

- 673 Casida JE. 2018. Neonicotinoids and other insect nicotinic receptor competitive modulators: Progress  
674 and prospects. *Annu Rev Entomol* **63**:125–144. doi:10.1146/annurev-ento-020117-043042
- 675 Chauzat MP, Faucon JP, Martel AC, Lachaize J, Cougoule N, Aubert M. 2006. A survey of pesticide  
676 residues in pollen loads collected by honey bees in France. *J Econ Entomol* **99**:253–262.  
677 doi:10.1093/jee/99.2.253
- 678 Chittka L. 2017. Bee cognition. *Curr Biol* **27**:R1049–R1053. doi:10.1016/j.cub.2017.08.008
- 679 Cnaani J, Schmid-Hempel R, Schmidt JO. 2002. Colony development, larval development and worker  
680 reproduction in *Bombus impatiens* Cresson. *Insectes Soc* **49**:164–170. doi:10.1007/s00040-002-  
681 8297-8
- 682 Crall JD, Switzer CM, Oppenheimer RL, Ford Versypt AN, Dey B, Brown A, Eyster M, Guérin C, Pierce  
683 NE, Combes SA, de Bivort BL. 2018. Neonicotinoid exposure disrupts bumblebee nest behavior,  
684 social networks, and thermoregulation. *Science (80- )* **362**:683–686.  
685 doi:10.1126/science.aat1598
- 686 Cressey D. 2017. The bitter battle over the world's most popular insecticides. *Nature* **551**:156–158.  
687 doi:10.1038/551156a
- 688 Cresswell JE, Page CJ, Uygun MB, Holmbergh M, Li Y, Wheeler JG, Laycock I, Pook CJ, de Ibarra NH,  
689 Smirnoff N, Tyler CR. 2012. Differential sensitivity of honey bees and bumble bees to a dietary  
690 insecticide (imidacloprid). *Zoology* **115**:365–371. doi:10.1016/j.zool.2012.05.003
- 691 Daniele G, Giroud B, Jabot C, Vulliet E. 2018. Exposure assessment of honeybees through study of  
692 hive matrices: analysis of selected pesticide residues in honeybees, beebread, and beeswax  
693 from French beehives by LC-MS/MS. *Environ Sci Pollut Res* **25**:6145–6153. doi:10.1007/s11356-  
694 017-9227-7
- 695 David A, Botías C, Abdul-Sada A, Nicholls E, Rotheray EL, Hill EM, Goulson D. 2016. Widespread  
696 contamination of wildflower and bee-collected pollen with complex mixtures of neonicotinoids  
697 and fungicides commonly applied to crops. *Environ Int* **88**:169–178.  
698 doi:10.1016/j.envint.2015.12.011
- 699 Decourtye A, Armengaud C, Renou M, Devillers J, Cluzeau S, Gauthier M, Pham-Delègue MH. 2004.  
700 Imidacloprid impairs memory and brain metabolism in the honeybee (*Apis mellifera* L.). *Pestic  
701 Biochem Physiol* **78**:83–92. doi:10.1016/j.pestbp.2003.10.001
- 702 Démares FJ, Crous KL, Pirk CWW, Nicolson SW, Human H. 2016. Sucrose sensitivity of honey bees is  
703 differently affected by dietary protein and a neonicotinoid pesticide. *PLoS One* **11**:e0156584.  
704 doi:10.1371/journal.pone.0156584
- 705 Démares FJ, Pirk CWW, Nicolson SW, Human H. 2018. Neonicotinoids decrease sucrose  
706 responsiveness of honey bees at first contact. *J Insect Physiol* **108**:25–30.  
707 doi:10.1016/j.jinsphys.2018.05.004
- 708 Desneux N, Decourtye A, Delpuech J-M. 2007. The sublethal effects of pesticides on beneficial  
709 arthropods. *Annu Rev Entomol* **52**:81–106. doi:10.1146/annurev.ento.52.110405.091440
- 710 Duchateau MJ, Velthuis HHW. 1988. Development and reproductive strategies in *Bombus terrestris*  
711 colonies. *Behaviour* **107**:186–207. doi:10.1163/156853988x00340
- 712 Durst C, Eichmüller S, Menzel R. 1994. Development and experience lead to increased volume of  
713 subcompartments of the honeybee mushroom body. *Behav Neural Biol* **62**:259–263.

- 714 doi:10.1016/S0163-1047(05)80025-1
- 715 Dyer AG, Paulk AC, Reser DH. 2011. Colour processing in complex environments: Insights from the  
716 visual system of bees. *Proceedings of the Royal Society B: Biological Sciences*.  
717 doi:10.1098/rspb.2010.2412
- 718 Fahrbach SE. 2006. Structure of the mushroom bodies of the insect brain. *Annu Rev Entomol* **51**:209–  
719 232. doi:10.1146/annurev.ento.51.110104.150954
- 720 Fahrbach SE, Moore D, Capaldi EA, Farris SM, Robinson GE. 1998. Experience-expectant plasticity in  
721 the mushroom bodies of the honeybee. *Learn Mem* **5**:115–123. doi:10.1101/lm.5.1.115
- 722 Fahrbach SE, Strande JL, Robinson GE. 1995. Neurogenesis is absent in the brains of adult honey  
723 bees and does not explain behavioral neuroplasticity. *Neurosci Lett* **197**:145–148.  
724 doi:10.1016/0304-3940(95)11913-H
- 725 Farris SM, Robinson GE, Davis RL, Fahrbach SE. 1999. Larval and pupal development of the  
726 mushroom bodies in the honey bee, *Apis mellifera*. *J Comp Neurol* **414**:97–113.  
727 doi:10.1002/(SICI)1096-9861(19991108)414:1<97::AID-CNE8>3.0.CO;2-Q
- 728 Farris SM, Robinson GE, Fahrbach SE. 2001. Experience- and age-related outgrowth of intrinsic  
729 neurons in the mushroom bodies of the adult worker honeybee. *J Neurosci* **21**:6395–6404.  
730 doi:citeulike-article-id:467293
- 731 Feltham H, Park K, Goulson D. 2014. Field realistic doses of pesticide imidacloprid reduce bumblebee  
732 pollen foraging efficiency. *Ecotoxicology* **23**:317–323. doi:10.1007/s10646-014-1189-7
- 733 Fischer J, Mueller T, Spatz A-K, Greggers U, Gruenewald B, Menzel R. 2014. Neonicotinoids interfere  
734 with specific components of navigation in Honeybees. *PLoS One* **9**:e91364.  
735 doi:10.1371/journal.pone.0091364
- 736 Galizia CG, Sachse S, Rappert A, Menzel R. 1999. The glomerular code for odor representation is  
737 species specific in the honeybee *Apis mellifera*. *Nat Neurosci* **2**:473–478. doi:10.1038/8144
- 738 Galizia GC, Galizia CG, Eisenhardt D, Giurfa M, York N, Eisenhardt ED, Galizia, G.C. and Eisenhardt, D.  
739 and Galizia, C.G. and Giurfa M. 2011. Honeybee neurobiology and behavior: A tribute to  
740 Randolph Menzel.
- 741 Garibaldi LA, Steffan-Dewenter I, Winfree R, Aizen MA, Bommarco R, Cunningham SA, Kremen C,  
742 Carvalheiro LG, Harder LD, Afik O, Bartomeus I, Benjamin F, Boreux V, Cariveau D, Chacoff NP,  
743 Dudenhöffer JH, Freitas BM, Ghazoul J, Greenleaf S, Hipólito J, Holzschuh A, Howlett B, Isaacs R,  
744 Javorek SK, Kennedy CM, Krewenka KM, Krishnan S, Mandelik Y, Mayfield MM, Motzke I,  
745 Munyuli T, Nault BA, Otieno M, Petersen J, Pisanty G, Potts SG, Rader R, Ricketts TH, Rundlöf  
746 M, Seymour CL, Schüepp C, Szentgyörgyi H, Taki H, Tscharntke T, Vergara CH, Viana BF, Wanger  
747 TC, Westphal C, Williams N, Klein AM. 2013. Wild pollinators enhance fruit set of crops  
748 regardless of Honeybee abundance. *Science (80- )* **339**:1608–1611.  
749 doi:10.1126/science.1230200
- 750 Gill RJ, Baldock KCR, Brown MJF, Cresswell JE, Dicks L V., Fountain MT, Garratt MPD, Gough LA,  
751 Heard MS, Holland JM, Ollerton J, Stone GN, Tang CQ, Vanbergen AJ, Vogler AP, Woodward G,  
752 Arce AN, Boatman ND, Brand-Hardy R, Breeze TD, Green M, Hartfield CM, O’Connor RS,  
753 Osborne JL, Phillips J, Sutton PB, Potts SG. 2016. Protecting an ecosystem service: Approaches  
754 to understanding and mitigating threats to wild insect pollinators. *Adv Ecol Res* **54**:135–206.  
755 doi:10.1016/bs.aecr.2015.10.007

- 756 Gill RJ, Raine NE. 2014. Chronic impairment of bumblebee natural foraging behaviour induced by  
757 sublethal pesticide exposure. *Funct Ecol* **28**:1459–1471. doi:10.1111/1365-2435.12292
- 758 Gill RJ, Ramos-Rodriguez O, Raine NE. 2012. Combined pesticide exposure severely affects individual-  
759 and colony-level traits in bees. *Nature* **491**:105–8. doi:10.1038/nature11585
- 760 Giurfa M, Sandoz JC. 2012. Invertebrate learning and memory: Fifty years of olfactory conditioning of  
761 the proboscis extension response in honeybees. *Learn Mem* **19**:54–66.  
762 doi:10.1101/lm.024711.111
- 763 Goulson D. 2010. Bumblebees: behaviour, ecology and conservation, 2nd ed. Oxford, UK: Oxford  
764 University Press.
- 765 Goulson D, Nicholls E, Botías C, Rotheray EL. 2015. Bee declines driven by combined stress from  
766 parasites, pesticides, and lack of flowers. *Science (80- )* **347**:1–16. doi:10.1126/science.1255957
- 767 Gregorc A, Evans JD, Scharf M, Ellis JD. 2012. Gene expression in honey bee (*Apis mellifera*) larvae  
768 exposed to pesticides and Varroa mites (*Varroa destructor*). *J Insect Physiol* **58**:1042–1049.  
769 doi:10.1016/j.jinsphys.2012.03.015
- 770 Groh C, Tautz J, Rossler W. 2004. Synaptic organization in the adult honey bee brain is influenced by  
771 brood-temperature control during pupal development. *Proc Natl Acad Sci* **101**:4268–4273.  
772 doi:10.1073/pnas.0400773101
- 773 Gutiérrez Y, Ott D, Töpferwien M, Salditt T, Scherber C. 2018. X-ray computed tomography and its  
774 potential in ecological research: A review of studies and optimization of specimen preparation.  
775 *Ecol Evol* **8**:7717–7732. doi:10.1002/ece3.4149
- 776 Hallmann CA, Sorg M, Jongejans E, Siepel H, Hofland N, Schwan H, Stenmans W, Müller A, Sumser H,  
777 Hörren T, Goulson D, De Kroon H. 2017. More than 75 percent decline over 27 years in total  
778 flying insect biomass in protected areas. *PLoS One* **12**:e0185809.  
779 doi:10.1371/journal.pone.0185809
- 780 Hammer M, Menzel R. 1995. Learning and memory in the honeybee. *J Neurosci*.  
781 doi:10.1016/j.cub.2005.09.015
- 782 Hansson BS, Anton S. 2002. Function and morphology of the antennal lobe: New developments.  
783 *Annu Rev Entomol* **45**:203–231. doi:10.1146/annurev.ento.45.1.203
- 784 Heard MS, Baas J, Dorne J Lou, Lahive E, Robinson AG, Rortais A, Spurgeon DJ, Svendsen C, Hesketh  
785 H. 2017. Comparative toxicity of pesticides and environmental contaminants in bees: Are  
786 honey bees a useful proxy for wild bee species? *Sci Total Environ* **578**:357–365.  
787 doi:10.1016/j.scitotenv.2016.10.180
- 788 Heisenberg M. 2003. Mushroom body memoir: From maps to models. *Nat Rev Neurosci* **4**:266–275.  
789 doi:10.1038/nrn1074
- 790 Heisenberg M. 1998. What do the mushroom bodies do for the insect brain? an introduction. *Learn*  
791 *Mem*. doi:10.1101/lm.5.1.1
- 792 Hourcade B, Muenz TS, Sandoz JC, Rossler W, Devaud JM. 2010. Long-term memory leads to synaptic  
793 reorganization in the mushroom bodies: A memory trace in the insect Brain? *J Neurosci*  
794 **30**:6461–6465. doi:10.1523/jneurosci.0841-10.2010
- 795 Jeschke P, Nauen R. 2008. Neonicotinoids - From zero to hero in insecticide chemistry. *Pest Manag*



796 *Sci.* doi:10.1002/ps.1631

797 Johnson BR. 2010. Division of labor in honeybees: Form, function, and proximate mechanisms.  
798 *Behav Ecol Sociobiol* **64**:305–316. doi:10.1007/s00265-009-0874-7

799 Jones BM, Leonard AS, Papaj DR, Gronenberg W. 2013. Plasticity of the worker bumblebee brain in  
800 relation to age and rearing environment. *Brain Behav Evol* **82**:250–261.  
801 doi:10.1159/000355845

802 Kasiotis KM, Anagnostopoulos C, Anastasiadou P, Machera K. 2014. Pesticide residues in honeybees,  
803 honey and bee pollen by LC-MS/MS screening: Reported death incidents in honeybees. *Sci*  
804 *Total Environ* **485**:633–642. doi:10.1016/j.scitotenv.2014.03.042

805 Kühn-Bühlmann S, Wehner R. 2006. Age-dependent and task-related volume changes in the  
806 mushroom bodies of visually guided desert ants, *Cataglyphis bicolor*. *J Neurobiol* **66**:511–521.  
807 doi:10.1002/neu.20235

808 Laloi D, Sandoz JC, Picard-Nizou AL, Marchesi A, Pouvreau A, Taséi JN, Poppy G, Pham-Delègue MH.  
809 1999. Olfactory conditioning of the proboscis extension in bumble bees. *Entomol Exp Appl*  
810 **90**:123–129. doi:10.1023/A:1003598301272

811 Leza M, Watrous KM, Bratu J, Woodard SH. 2018. Effects of neonicotinoid insecticide exposure and  
812 monofloral diet on nest-founding bumblebee queens. *Proc R Soc B Biol Sci* **285**:20180761.  
813 doi:10.1098/rspb.2018.0761

814 Li L, MaBouDi H Di, Egertová M, Elphick MR, Chittka L, Perry CJ. 2017. A possible structural correlate  
815 of learning performance on a colour discrimination task in the brain of the bumblebee. *Proc R*  
816 *Soc B Biol Sci* **284**:20171323. doi:10.1098/rspb.2017.1323

817 Li W, Pan Y, Wang Z, Gong H, Gong Z, Liu L. 2009. Morphological characterization of single fan-  
818 shaped body neurons in *Drosophila melanogaster*. *Cell Tissue Res.* doi:10.1007/s00441-009-  
819 0781-2

820 Lotto RB, Chittka L. 2005. Seeing the light: Illumination as a contextual cue to color choice behavior  
821 in bumblebees. *Proc Natl Acad Sci.* doi:10.1073/pnas.0500681102

822 Maleszka J, Barron AB, Helliwell PG, Maleszka R. 2009. Effect of age, behaviour and social  
823 environment on honey bee brain plasticity. *J Comp Physiol A Neuroethol Sensory, Neural, Behav*  
824 *Physiol* **195**:733–740. doi:10.1007/s00359-009-0449-0

825 Mitchell EAD, Mulhauser B, Mulot M, Mutabazi A, Glauser G, Aebi A. 2017. A worldwide survey of  
826 neonicotinoids in honey. *Science (80- )* **358**:109–111. doi:10.1126/science.aan3684

827 Mobbs PG. 2006. The Brain of the Honeybee *Apis Mellifera*. I. The Connections and Spatial  
828 Organization of the Mushroom Bodies. *Philos Trans R Soc B Biol Sci.*  
829 doi:10.1098/rstb.1982.0086

830 Mullin CA, Frazier M, Frazier JL, Ashcraft S, Simonds R, VanEngelsdorp D, Pettis JS. 2010. High levels  
831 of miticides and agrochemicals in North American apiaries: Implications for Honeybee health.  
832 *PLoS One* **5**:e9754. doi:10.1371/journal.pone.0009754

833 Muth F, Leonard AS. 2019. A neonicotinoid pesticide impairs foraging, but not learning, in free-flying  
834 bumblebees. *Sci Rep* **9**:4764.

835 Palmer MJ, Moffat C, Saranzewa N, Harvey J, Wright GA, Connolly CN. 2013. Cholinergic pesticides

- 836 cause mushroom body neuronal inactivation in honeybees. *Nat Commun* **4**:1634.  
837 doi:10.1038/ncomms2648
- 838 Paulk Angelique C., Dacks AM, Gronenberg W. 2009. Color processing in the medulla of the  
839 bumblebee (Apidae: *Bombus impatiens*). *J Comp Neurol*. doi:10.1002/cne.21993
- 840 Paulk A. C., Dacks AM, Phillips-Portillo J, Fellous J-M, Gronenberg W. 2009. Visual Processing in the  
841 Central Bee Brain. *J Neurosci*. doi:10.1523/JNEUROSCI.1325-09.2009
- 842 Paulk AC, Phillips-Portillo J, Dacks AM, Fellous J-M, Gronenberg W. 2008. The Processing of Color,  
843 Motion, and Stimulus Timing Are Anatomically Segregated in the Bumblebee Brain. *J Neurosci*.  
844 doi:10.1523/jneurosci.1196-08.2008
- 845 Peng YC, Yang EC. 2016. Sublethal dosage of imidacloprid reduces the microglomerular density of  
846 honey bee mushroom bodies. *Sci Rep* **6**:19298. doi:10.1038/srep19298
- 847 Pfeiffer K, Homberg U. 2013. Organization and Functional Roles of the Central Complex in the Insect  
848 Brain. *Annu Rev Entomol*. doi:10.1146/annurev-ento-011613-162031
- 849 Piironen S, Goulson D. 2016. Chronic neonicotinoid pesticide exposure and parasite stress  
850 differentially affects learning in honeybees and bumblebees. *Proc R Soc B Biol Sci*  
851 **283**:20160246. doi:10.1098/rspb.2016.0246
- 852 Pohorecka K, Skubida P, Miszczak A, Semkiw P, Sikorski P, Zagibajlo K, Teper D, Koltowski Z, Skubida  
853 M, Zdanska D, Bober A. 2012. Residues of neonicotinoid insecticides in bee collected plant  
854 materials from Oilseed Rape crops and their effect on bee colonies. *J Apic Sci* **56**:115–134.  
855 doi:DOI 10.2478/v10289-012-0029-3
- 856 Pohorecka K, Szczęśna T, Witek M, Miszczak A, Sikorski P. 2017. The exposure of honey bees to  
857 pesticide residues in the hive environment with regard to winter colony losses. *J Apic Sci*  
858 **61**:105–125. doi:10.1515/JAS-2017-0013
- 859 Potts SG, Imperatriz-Fonseca V, Ngo HT, Aizen MA, Biesmeijer JC, Breeze TD, Dicks L V., Garibaldi LA,  
860 Hill R, Settele J, Vanbergen AJ. 2016. Safeguarding pollinators and their values to human well-  
861 being. *Nature* **540**:220–229. doi:10.1038/nature20588
- 862 Ribi W, Senden TJ, Sakellariou A, Limaye A, Zhang S. 2008. Imaging honey bee brain anatomy with  
863 micro-X-ray-computed tomography. *J Neurosci Methods* **171**:93–97.  
864 doi:10.1016/j.jneumeth.2008.02.010
- 865 Riveros AJ, Gronenberg W. 2010. Brain allometry and neural plasticity in the bumblebee *bombus*  
866 *occidentalis*. *Brain Behav Evol* **75**:138–148. doi:10.1159/000306506
- 867 Riveros AJ, Gronenberg W. 2009. Olfactory learning and memory in the bumblebee *Bombus*  
868 *occidentalis*. *Naturwissenschaften* **96**:851–856. doi:10.1007/s00114-009-0532-y
- 869 Rundlöf M, Andersson GKS, Bommarco R, Fries I, Hederström V, Herbertsson L, Jonsson O, Klatt  
870 BKBK, Pedersen TR, Yourstone J, Smith HG, Rundlof M, Andersson GKS, Bommarco R, Fries I,  
871 Hederstrom V, Herbertsson L, Jonsson O, Klatt BKBK, Pedersen TR, Yourstone J, Smith HG.  
872 2015. Seed coating with a neonicotinoid insecticide negatively affects wild bees. *Nature*  
873 **521**:77-U162. doi:10.1038/nature14420
- 874 Sachse S, Rappert A, Galizia CG. 1999. The spatial representation of chemical structures in the  
875 antennal lobe of honeybees: Steps towards the olfactory code. *Eur J Neurosci* **11**:3970–3982.  
876 doi:10.1046/j.1460-9568.1999.00826.x

- 877 Samuelson EEW, Chen-Wishart ZP, Gill RJ, Leadbeater E. 2016. Effect of acute pesticide exposure on  
878 bee spatial working memory using an analogue of the radial-arm maze. *Sci Rep* **6**:38957.  
879 doi:10.1038/srep38957
- 880 Sandrock C, Tanadini LG, Pettis JS, Biesmeijer JC, Potts SG, Neumann P. 2014. Sublethal  
881 neonicotinoid insecticide exposure reduces solitary bee reproductive success. *Agric For*  
882 *Entomol* **16**:119–128. doi:10.1111/afe.12041
- 883 Simmons DM, Swanson LW. 2009. Comparing histological data from different brains: Sources of  
884 error and strategies for minimizing them. *Brain Res Rev* **60**:349–367.  
885 doi:10.1016/j.brainresrev.2009.02.002
- 886 Siviter H, Brown MJF, Leadbeater E. 2018a. Sulfoxaflor exposure reduces bumblebee reproductive  
887 success. *Nature* **561**:109–112. doi:10.1038/s41586-018-0430-6
- 888 Siviter H, Koricheva J, Brown MJF, Leadbeater E. 2018b. Quantifying the impact of pesticides on  
889 learning and memory in bees. *J Appl Ecol* **55**:2812–2821. doi:10.1111/1365-2664.13193
- 890 Smith BH, Burden CM. 2014. A proboscis extension response protocol for investigating behavioral  
891 plasticity in insects: Application to basic, biomedical, and agricultural research. *J Vis Exp*  
892 **8**:e51057. doi:10.3791/51057
- 893 Smith DB, Bernhardt G, Raine NE, Abel RL, Sykes D, Ahmed F, Pedroso I, Gill RJ. 2016. Exploring  
894 miniature insect brains using micro-CT scanning techniques. *Sci Rep* **6**:21768.  
895 doi:10.1038/srep21768
- 896 Smith KE, Raine NE. 2014. A comparison of visual and olfactory learning performance in the  
897 bumblebee *Bombus terrestris*. *Behav Ecol Sociobiol* **68**:1549–1559. doi:10.1007/s00265-014-  
898 1765-0
- 899 Sommerlandt FMJ, Rossler W, Spaethe J. 2014. Elemental and non-elemental olfactory learning using  
900 per conditioning in the bumblebee, *Bombus terrestris*. *Apidologie* **45**:106–115.  
901 doi:10.1007/s13592-013-0227-4
- 902 Stanley DA, Raine NE. 2016. Chronic exposure to a neonicotinoid pesticide alters the interactions  
903 between bumblebees and wild plants. *Funct Ecol* **30**:1132–1139. doi:10.1111/1365-2435.12644
- 904 Stanley DA, Smith KE, Raine NE. 2015. Bumblebee learning and memory is impaired by chronic  
905 exposure to a neonicotinoid pesticide. *Sci Rep* **5**:16508. doi:10.1038/srep16508
- 906 Steijven K, Spaethe J, Steffan-Dewenter I, Härtel S. 2017. Learning performance and brain structure  
907 of artificially-reared honey bees fed with different quantities of food. *PeerJ* **5**:e3858.  
908 doi:10.7717/peerj.3858
- 909 Strauss R. 2002. The central complex and the genetic dissection of locomotor behaviour. *Curr Opin*  
910 *Neurobiol*. doi:10.1016/S0959-4388(02)00385-9
- 911 Tan K, Chen W, Dong S, Liu X, Wang Y, Nieh JC. 2015. A neonicotinoid impairs olfactory learning in  
912 Asian honey bees (*Apis cerana*) exposed as larvae or as adults. *Sci Rep* **5**:10989.  
913 doi:10.1038/srep10989
- 914 Thany SH, Gauthier M. 2005. Nicotine injected into the antennal lobes induces a rapid modulation of  
915 sucrose threshold and improves short-term memory in the honeybee *Apis mellifera*. *Brain Res*  
916 **1039**:216–219. doi:10.1016/j.brainres.2005.01.056

- 917 Tison L, Holtz S, Adeoye A, Kalkan Ö, Irmisch NS, Lenmann N, Menzel R. 2017. Effects of sublethal  
918 doses of thiacloprid and its formulation Calypso® on the learning and memory performance of  
919 honey bees. *J Exp Biol* **220**:3695–3705. doi:10.1242/jeb.154518
- 920 Tomé HVV, Martins GF, Lima MAP, Campos LAO, Guedes RNC. 2012. Imidacloprid-induced  
921 impairment of mushroom bodies and behavior of the native stingless bee *Melipona*  
922 *quadrifasciata anthidioides*. *PLoS One* **7**:e38406. doi:10.1371/journal.pone.0038406
- 923 Tosi S, Nieh JC. 2019. Lethal and sublethal synergistic effects of a new systemic pesticide,  
924 flupyradifurone (Sivantow), on honeybees. *Proc R Soc B* **286**:20190433.
- 925 Tsvetkov N, Samson-Robert O, Sood K, Patel HS, Malena DA, Gajiwala PH, Maciukiewicz P, Fournier  
926 V, Zayed A. 2017. Chronic exposure to neonicotinoids reduces honey bee health near corn  
927 crops. *Science (80- )* **356**:1395–1397. doi:10.1126/science.aam7470
- 928 Valdovinos-Flores C, Alcantar-Rosales VM, Gaspar-Ramírez O, Saldaña-Loza LM, Dorantes-Ugalde JA.  
929 2017. Agricultural pesticide residues in honey and wax combs from Southeastern, Central and  
930 Northeastern Mexico. *J Apic Res* **56**:667–679. doi:10.1080/00218839.2017.1340798
- 931 Vanbergen AJ. 2013. Threats to an ecosystem service: Pressures on pollinators. *Front Ecol Environ*  
932 **11**:251–259. doi:10.1890/120126
- 933 Whitehorn PR, O'Connor S, Wackers FL, Goulson D. 2012. Neonicotinoid pesticide reduces bumble  
934 bee colony growth and queen production. *Science (80- )* **336**:351–352.  
935 doi:10.1126/science.1215025
- 936 Wilson DE, Velarde RA, Fahrbach SE, Mommaerts V, Smaghe G. 2013. Use of primary cultures of  
937 Kenyon cells from bumblebee brains to assess pesticide side effects. *Arch Insect Biochem*  
938 *Physiol* **84**:43–56. doi:10.1002/arch.21112
- 939 Winnington AP, Napper RM, Mercer AR. 1996. Structural plasticity of identified glomeruli in the  
940 antennal lobes of the adult worker honey bee. *J Comp Neurol* **365**:479–490.  
941 doi:10.1002/(SICI)1096-9861(19960212)365:3<479::AID-CNE10>3.0.CO;2-M
- 942 Withers GS, Fahrbach SE, Robinson GE. 1995. Effects of experience and juvenile hormone on the  
943 organization of the mushroom bodies of honey bees. *J Neurobiol* **26**:130–144.  
944 doi:10.1002/neu.480260111
- 945 Withers GS, Fahrbach SE, Robinson GE. 1993. Selective neuroanatomical plasticity and division of  
946 labour in the honeybee. *Nature* **364**:238–240. doi:10.1038/364238a0
- 947 Woodcock BA, Bullock JM, Shore RF, Heard MS, Pereira MG, Redhead J, Ridding L, Dean H, Sleep D,  
948 Henrys P, Peyton J, Hulmes S, Hulmes L, Sároszpataki M, Saure C, Edwards M, Genersch E, Knäbe  
949 S, Pywell RF. 2017. Country-specific effects of neonicotinoid pesticides on honey bees and wild  
950 bees. *Science (80- )* **356**:1393–1395. doi:10.1126/science.aaa1190
- 951 Woodcock BA, Isaac NJB, Bullock JM, Roy DB, Garthwaite DG, Crowe A, Pywell RF. 2016. Impacts of  
952 neonicotinoid use on long-term population changes in wild bees in England. *Nat Commun*  
953 **7**:12459. doi:10.1038/ncomms12459
- 954 Wu JY, Anelli CM, Sheppard WS. 2011. Sub-lethal effects of pesticide residues in brood comb on  
955 worker honey bee (*Apis mellifera*) development and longevity. *PLoS One* **6**:e14720.  
956 doi:10.1371/journal.pone.0014720
- 957 Wu JY, Smart MD, Anelli CM, Sheppard WS. 2012. Honey bees (*Apis mellifera*) reared in brood combs

- 958 containing high levels of pesticide residues exhibit increased susceptibility to Nosema  
959 (Microsporidia) infection. *J Invertebr Pathol* **109**:326–329. doi:10.1016/j.jip.2012.01.005
- 960 Yang EC, Chang HC, Wu WY, Chen YW. 2012. Impaired olfactory associative behavior of Honeybee  
961 workers due to contamination of Imidacloprid in the larval stage. *PLoS One* **7**:e49472.  
962 doi:10.1371/journal.pone.0049472
- 963 Zars T. 2000. Behavioral functions of the insect mushroom bodies. *Curr Opin Neurobiol.*  
964 doi:10.1016/S0959-4388(00)00147-1
- 965 Zhang W. 2018. Global pesticide use: Profile, trend, cost / benefit and more. *Proc Int Acad Ecol*  
966 *Environ Sci* **8**:1–27.
- 967
- 968
